# Supplementary material for: Limited exchange between the deep Pacific and Atlantic oceans during the warm mid-Pliocene and Marine Isotope Stage M2 “glaciation”
Source: Copernicus journal article supplement (doi:10.5194/cp-19-2109-2023), 2023-11-01
Supplement: Supplementary file 1 [file Braaten et al. Supplement_Tables.xlsx]

## Sheet: Table S1 U1308 D47
		Table S1: Δ47 sample measurement data from IODP Site U1308
Lab ID	Sample label	Age (ka BP)	Depth (mcd)	Date and time of measurement	d47 WG (PBL) (‰)	D47 WG (PBL) (‰)	D48 WG (PBL) (‰)	d13C VPDB (Final) (‰)	d18O VPDB (Final) (‰)	D47 CDES (Final) (‰)	Species
QE-D1	303-U1308C-25H-5,100-102	3196.83	254.01	2020-11-30 16:50	21.14	-0.207	0.34	0.3	2.87	0.675	Globocassidulina spp.
QE-D1	303-U1308C-25H-5,100-102	3196.83	254.01	2020-12-08 18:52	20.844	-0.235	0.244	0.17	2.76	0.641	Globocassidulina spp.
QE-D1	303-U1308C-25H-5,100-102	3196.83	254.01	2021-01-23 17:07	22.259	-0.206	0.675	0.8	3.53	0.665	Pyrgo spp.
QE-D1	303-U1308C-25H-5,100-102	3196.83	254.01	2021-02-24 18:47	20.844	-0.19	0.685	0.15	2.8	0.666	Globocassidulina spp.
QE-D1	303-U1308C-25H-5,100-102	3196.83	254.01	2021-03-08 21:02	20.826	-0.179	0.962	0.23	2.68	0.68	Globocassidulina spp.
QE-D1	303-U1308C-25H-5,100-102	3196.83	254.01	2021-03-13 04:21	21.097	-0.206	1.183	0.72	2.52	0.664	Melonis spp.
QE-D2	303-U1308C-25H-5,110-112	3198.39	254.11	2020-12-11 04:01	20.992	-0.21	0.162	0.31	2.73	0.667	Globocassidulina spp.
QE-D2	303-U1308C-25H-5,110-112	3198.39	254.11	2020-12-19 04:17	20.985	-0.194	4.712	0.52	2.5	0.682	Laticarinina pauperata
QE-D2	303-U1308C-25H-5,110-112	3198.39	254.11	2021-03-03 21:39	20.695	-0.18	0.541	0.18	2.63	0.677	Globocassidulina spp.
QE-D2	303-U1308C-25H-5,110-112	3198.39	254.11	2021-03-17 17:24	20.906	-0.229	1.197	0.32	2.75	0.638	Globocassidulina spp.
QE-D3	303-U1308C-25H-5,120-122	3199.96	254.21	2020-12-16 20:07	21.028	-0.234	0.405	0.23	2.87	0.638	Globocassidulina spp.
QE-D3	303-U1308C-25H-5,120-122	3199.96	254.21	2021-02-01 17:20	21.06	-0.204	0.545	0.4	2.76	0.668	Globocassidulina spp.
QE-D3	303-U1308C-25H-5,120-122	3199.96	254.21	2021-02-20 16:21	20.846	-0.184	1.328	0.17	2.77	0.673	Globocassidulina spp.
QE-D3	303-U1308C-25H-5,120-122	3199.96	254.21	2021-02-27 18:12	20.071	-0.229	1.486	-0.7	2.93	0.624	Gyroidinoides spp.
QE-D3	303-U1308C-25H-5,120-122	3199.96	254.21	2021-03-18 05:28	21.207	-0.19	1.382	0.4	2.93	0.68	Globocassidulina spp.
QE-D3	303-U1308C-25H-5,120-122	3199.96	254.21	2021-03-20 01:08	20.074	-0.211	2.065	-0.7	2.93	0.651	Gyroidinoides spp.
QE-D4	303-U1308C-25H-5,130-132	3201.53	254.31	2021-01-11 22:58	21.237	-0.249	1.269	0.93	2.46	0.626	Cibicidoides spp.
QE-D4	303-U1308C-25H-5,130-132	3201.53	254.31	2021-02-06 05:54	20.913	-0.221	2.383	0.26	2.78	0.652	Globocassidulina spp.
QE-D4	303-U1308C-25H-5,130-132	3201.53	254.31	2021-02-09 00:39	21.296	-0.196	0.445	0.93	2.5	0.678	Cibicidoides spp.
QE-D4	303-U1308C-25H-5,130-132	3201.53	254.31	2021-02-19 21:32	20.964	-0.213	0.59	0.77	2.35	0.641	Cibicidoides spp.
QE-D4	303-U1308C-25H-5,130-132	3201.53	254.31	2021-02-25 00:26	21.877	-0.182	0.326	0.43	3.53	0.674	Pyrgo spp.
QE-D4	303-U1308C-25H-5,130-132	3201.53	254.31	2021-03-20 14:38	21.143	-0.21	4.881	0.85	2.49	0.651	Cibicidoides spp.
QE-D5	303-U1308C-25H-5,140-142	3203.09	254.41	2021-01-12 03:16	20.774	-0.244	0.724	0.1	2.8	0.633	Globocassidulina spp.
QE-D5	303-U1308C-25H-5,140-142	3203.09	254.41	2021-02-18 04:59	20.824	-0.211	1.007	0.15	2.81	0.643	Globocassidulina spp.
QE-D5	303-U1308C-25H-5,140-142	3203.09	254.41	2021-03-04 05:33	21.068	-0.221	0.62	0.36	2.86	0.633	Globocassidulina spp.
QE-D5	303-U1308C-25H-5,140-142	3203.09	254.41	2021-03-24 17:27	20.779	-0.211	1.095	0.25	2.68	0.645	Globocassidulina spp.
QE-D6	303-U1308C-25H-6,0-2	3204.65	254.51	2020-12-21 05:34	20.247	-0.213	1.175	-0.61	2.91	0.662	Gyroidinoides spp.
QE-D6	303-U1308C-25H-6,0-2	3204.65	254.51	2020-12-22 21:32	20.194	-0.228	0.553	-0.67	2.93	0.642	Gyroidinoides spp.
QE-D7	303-U1308C-25H-6,10-12	3206.22	254.61	2021-01-22 22:17	20.85	-0.234	1.156	0.13	2.83	0.633	Globocassidulina spp.
QE-D7	303-U1308C-25H-6,10-12	3206.22	254.61	2021-02-17 16:53	20.948	-0.213	0.857	0.29	2.79	0.641	Globocassidulina spp.
QE-D7	303-U1308C-25H-6,10-12	3206.22	254.61	2021-02-26 21:32	21.128	-0.197	0.964	0.33	2.95	0.658	Globocassidulina spp.
RF-E1	303-U1308-26H-1-26-28	3240	256.77	2020-11-30 17:34	21.238	-0.23	0.323	0.14	3.14	0.65	Globocassidulina spp.
RF-E1	303-U1308-26H-1-26-28	3240	256.77	2020-12-19 05:01	20.218	-0.22	2.105	-0.66	2.91	0.653	Gyroidinoides spp.
RF-E1	303-U1308-26H-1-26-28	3240	256.77	2021-02-09 01:20	20.237	-0.198	0.404	-0.55	2.88	0.676	Gyroidinoides spp.
RF-E1	303-U1308-26H-1-26-28	3240	256.77	2021-02-24 21:39	20.207	-0.226	0.444	-0.67	3	0.626	Gyroidinoides spp.
RF-E1	303-U1308-26H-1-26-28	3240	256.77	2021-03-03 18:50	20.951	-0.183	0.788	0.1	2.96	0.673	Globocassidulina spp.
RF-E1	303-U1308-26H-1-26-28	3240	256.77	2021-03-08 23:11	20.725	-0.18	0.915	0.28	2.55	0.679	Globocassidulina spp.
RF-E1	303-U1308-26H-1-26-28	3240	256.77	2021-03-13 05:05	20.208	-0.226	0.643	-0.58	2.92	0.642	Gyroidinoides spp.
RF-E2	303-U1308-26H-1-36-38	3241.01	256.87	2020-12-21 04:53	21.083	-0.231	1.31	0.2	2.95	0.642	Globocassidulina spp.
RF-E2	303-U1308-26H-1-36-38	3241.01	256.87	2021-01-11 23:41	21.06	-0.224	0.723	0.16	3	0.652	Globocassidulina spp.
RF-E2	303-U1308-26H-1-36-38	3241.01	256.87	2021-02-17 17:40	20.797	-0.168	0.618	0.33	2.56	0.688	Laticarinina pauperata
RF-E2	303-U1308-26H-1-36-38	3241.01	256.87	2021-02-20 01:44	21.14	-0.207	1.241	0.35	2.9	0.648	Pyrgo spp.
RF-E2	303-U1308-26H-1-36-38	3241.01	256.87	2021-03-17 18:11	20.792	-0.241	0.592	0.22	2.75	0.625	Globocassidulina spp.
RF-E2	303-U1308-26H-1-36-38	3241.01	256.87	2021-03-20 01:57	20.943	-0.219	1.801	0.49	2.65	0.643	Laticarinina pauperata
RF-E3	303-U1308-26H-1-46-48	3242.03	256.97	2020-12-08 19:33	21.011	-0.202	0.214	0.14	2.91	0.677	Globocassidulina spp.
RF-E3	303-U1308-26H-1-46-48	3242.03	256.97	2021-01-23 01:28	20.465	-0.196	0.957	0.16	2.39	0.672	Globocassidulina spp.
RF-E3	303-U1308-26H-1-46-48	3242.03	256.97	2021-02-25 05:31	21.226	-0.221	0.216	0.27	3.1	0.63	Globocassidulina spp.
RF-E3	303-U1308-26H-1-46-48	3242.03	256.97	2021-02-27 11:47	20.757	-0.244	1.124	0.15	2.81	0.608	Globocassidulina spp.
RF-E4	303-U1308-26H-1-56-58	3243.04	257.07	2020-12-11 04:44	21.2	-0.181	0.496	0.74	2.5	0.699	Cibicidoides spp.
RF-E4	303-U1308-26H-1-56-58	3243.04	257.07	2021-01-23 17:49	20.774	-0.223	1.593	0.39	2.5	0.646	Melonis spp.
RF-E4	303-U1308-26H-1-56-58	3243.04	257.07	2021-02-01 18:10	21.207	-0.226	0.576	0.78	2.57	0.644	Cibicidoides spp.
RF-E4	303-U1308-26H-1-56-58	3243.04	257.07	2021-02-17 22:35	20.707	-0.199	0.864	0.23	2.6	0.656	Melonis spp.
RF-E4	303-U1308-26H-1-56-58	3243.04	257.07	2021-02-20 17:44	21.126	-0.166	1.866	0.62	2.6	0.692	Cibicidoides spp.
RF-E4	303-U1308-26H-1-56-58	3243.04	257.07	2021-03-20 15:28	20.926	-0.223	3.139	0.59	2.54	0.637	Cibicidoides spp.
RF-E5	303-U1308-26H-1-66-68	3244.06	257.17	2020-12-16 20:47	21.47	-0.217	0.489	0.62	2.91	0.657	Pyrgo spp.
RF-E5	303-U1308-26H-1-66-68	3244.06	257.17	2020-12-22 20:51	20.639	-0.236	0.189	0.54	2.23	0.633	Globocassidulina spp.
RF-E5	303-U1308-26H-1-66-68	3244.06	257.17	2021-02-06 06:37	20.997	-0.215	1.158	0.2	2.91	0.659	Globocassidulina spp.
RF-E5	303-U1308-26H-1-66-68	3244.06	257.17	2021-02-27 02:31	20.93	-0.182	1.247	0.24	2.82	0.676	Globocassidulina spp.
RF-E5	303-U1308-26H-1-66-68	3244.06	257.17	2021-03-03 23:05	21.815	-0.198	0.627	0.36	3.55	0.658	Pyrgo spp.
RF-E5	303-U1308-26H-1-66-68	3244.06	257.17	2021-03-25 03:59	21.086	-0.234	2.271	0.33	2.93	0.621	Globocassidulina spp.
WG-A1	303-U1308C-26H-3,57-59	3273.56	260.08	2019-06-03 16:31	21.293	-0.224	-0.61	0.28	2.92	0.588	Globocassidulina spp.
WG-A1	303-U1308C-26H-3,57-59	3273.56	260.08	2019-06-13 19:35	22.233	-0.12	-0.113	0.52	3.63	0.706	Pyrgo spp.
WG-A1	303-U1308C-26H-3,57-59	3273.56	260.08	2019-10-25 02:29	21.266	-0.269	3.406	0.17	3.11	0.56	Globocassidulina spp.
WG-A1	303-U1308C-26H-3,57-59	3273.56	260.08	2019-11-13 23:33	21.452	-0.22	1.792	0.9	2.61	0.619	Cibicidoides wuellerstorfi
WG-A1	303-U1308C-26H-3,57-59	3273.56	260.08	2019-11-25 19:27	22.727	-0.237	0.022	1.1	3.67	0.608	Pyrgo spp.
WG-A1	303-U1308C-26H-3,57-59	3273.56	260.08	2019-12-21 04:18	21.305	-0.174	-0.599	0.34	2.95	0.669	Globocassidulina spp.
WG-A1	303-U1308C-26H-3,57-59	3273.56	260.08	2020-11-10 18:34	21.041	-0.238	0.368	0.05	3.07	0.642	Globocassidulina spp.
WG-A2	303-U1308C-26H-3,68-70	3274.67	260.19	2019-05-23 20:22	21.471	-0.128	-0.612	0.24	2.97	0.677	Globocassidulina spp.
WG-A2	303-U1308C-26H-3,68-70	3274.67	260.19	2019-05-23 22:10	21.718	-0.138	-0.552	0.84	2.64	0.666	Cibicidoides wuellerstorfi
WG-A2	303-U1308C-26H-3,68-70	3274.67	260.19	2019-06-03 18:17	21.379	-0.108	-0.474	0.18	2.99	0.709	Globocassidulina spp.
WG-A2	303-U1308C-26H-3,68-70	3274.67	260.19	2019-06-14 01:31	22.729	-0.222	-0.048	1.01	3.74	0.593	Pyrgo spp.
WG-A2	303-U1308C-26H-3,68-70	3274.67	260.19	2019-10-27 02:30	20.978	-0.144	1.258	0.14	2.75	0.703	Laticarinina pauperata
WG-A2	303-U1308C-26H-3,68-70	3274.67	260.19	2019-11-26 16:43	21.517	-0.167	0.438	0.92	2.61	0.685	Cibicidoides wuellerstorfi
WG-A2	303-U1308C-26H-3,68-70	3274.67	260.19	2020-02-02 08:39	20.978	-0.174	2.108	0.17	2.83	0.654	Laticarinina pauperata
WG-A2	303-U1308C-26H-3,68-70	3274.67	260.19	2020-08-04 16:23	15.371	-0.134	0.36	-3.38	0.59	0.72	Globocassidulina spp.
WG-A2	303-U1308C-26H-3,68-70	3274.67	260.19	2020-11-18 04:34	21.307	-0.197	0.387	0.24	3.09	0.683	Globocassidulina spp.
WG-A2	303-U1308C-26H-3,68-70	3274.67	260.19	2020-11-18 23:31	20.891	-0.193	0.602	0.3	2.62	0.69	Laticarinina pauperata
WG-A2	303-U1308C-26H-3,68-70	3274.67	260.19	2020-11-25 04:12	21.268	-0.23	0.278	0.16	3.17	0.645	Globocassidulina spp.
WG-A2	303-U1308C-26H-3,68-70	3274.67	260.19	2020-11-25 17:41	21.221	-0.219	0.241	0.26	3.01	0.653	Globocassidulina spp.
WG-A2	303-U1308C-26H-3,68-70	3274.67	260.19	2020-11-28 08:47	22.74	-0.227	0.117	1.13	3.64	0.65	Pyrgo spp.
WG-A2	303-U1308C-26H-3,68-70	3274.67	260.19	2020-11-30 19:03	21.248	-0.216	-0.015	0.23	3.05	0.666	Globocassidulina spp.
WG-A2	303-U1308C-26H-3,68-70	3274.67	260.19	2020-12-16 21:29	22.318	-0.211	0.386	0.84	3.51	0.664	Pyrgo spp.
WG-A2	303-U1308C-26H-3,68-70	3274.67	260.19	2020-12-19 07:54	22.369	-0.191	1.049	0.76	3.6	0.684	Pyrgo spp.
WG-A2	303-U1308C-26H-3,68-70	3274.67	260.19	2020-12-23 00:17	21.234	-0.219	0.408	0.24	3.06	0.654	Globocassidulina spp.
WG-A3	303-U1308C-26H-3,99-100,5	3277.82	260.5	2019-05-24 06:50	21.563	-0.159	-0.396	0.54	2.79	0.645	Laticarinina pauperata
WG-A3	303-U1308C-26H-3,99-100,5	3277.82	260.5	2019-05-24 08:09	22.771	-0.128	0.016	0.89	3.58	0.679	Pyrgo spp.
WG-A3	303-U1308C-26H-3,99-100,5	3277.82	260.5	2019-05-24 10:00	21.342	-0.165	-0.891	0.2	2.9	0.638	Globocassidulina spp.
WG-A3	303-U1308C-26H-3,99-100,5	3277.82	260.5	2019-06-03 18:53	21.224	-0.191	-0.453	-0.02	3.1	0.622	Globocassidulina spp.
WG-A3	303-U1308C-26H-3,99-100,5	3277.82	260.5	2019-06-04 06:44	20.676	-0.142	-7.299	0.27	2.25	0.671	Laticarinina pauperata
WG-A3	303-U1308C-26H-3,99-100,5	3277.82	260.5	2019-06-14 06:17	22.127	-0.191	-0.111	0.7	3.42	0.625	Pyrgo spp.
WG-A3	303-U1308C-26H-3,99-100,5	3277.82	260.5	2019-12-02 15:50	21.506	-0.167	0.536	0.84	2.66	0.676	Cibicidoides mundulus
WG-A3	303-U1308C-26H-3,99-100,5	3277.82	260.5	2019-12-20 22:28	21.261	-0.188	-0.334	0.54	2.73	0.652	Laticarinina pauperata
WG-A3	303-U1308C-26H-3,99-100,5	3277.82	260.5	2020-10-29 07:28	20.98	-0.191	0.759	0.31	2.71	0.686	Laticarinina pauperata
WG-A3	303-U1308C-26H-3,99-100,5	3277.82	260.5	2020-12-08 20:13	21.109	-0.212	0.203	0.17	2.99	0.666	Globocassidulina spp.
WG-A4	303-U1308C-26H-3,118-120	3279.75	260.69	2019-06-03 19:27	21.297	-0.163	-0.085	0.08	3.05	0.652	Globocassidulina spp.
WG-A4	303-U1308C-26H-3,118-120	3279.75	260.69	2019-06-14 07:35	22.524	-0.167	0.159	0.61	3.86	0.651	Pyrgo spp.
WG-A4	303-U1308C-26H-3,118-120	3279.75	260.69	2019-08-08 03:05	20.53	-0.189	-0.83	-0.43	2.93	0.64	Oridorsalis umbonatus
WG-A4	303-U1308C-26H-3,118-120	3279.75	260.69	2019-11-13 02:40	21.414	-0.203	0.34	-0.13	3.54	0.636	Globocassidulina spp.
WG-A4	303-U1308C-26H-3,118-120	3279.75	260.69	2019-11-19 19:30	23.031	-0.222	0.09	1.59	3.47	0.613	Pyrgo spp.
WG-A4	303-U1308C-26H-3,118-120	3279.75	260.69	2020-07-03 00:23	21.348	-0.295	0.456	0.85	2.8	0.609	Cibicidoides spp.
WG-A4	303-U1308C-26H-3,118-120	3279.75	260.69	2020-07-28 13:54	21.216	-0.241	-0.651	0.26	2.9	0.601	Globocassidulina spp.
WG-A4	303-U1308C-26H-3,118-120	3279.75	260.69	2020-11-04 20:52	21.219	-0.226	0.3	0.1	3.17	0.65	Globocassidulina spp.
WG-A4	303-U1308C-26H-3,118-120	3279.75	260.69	2022-01-30 16:13	21.239	-0.282	0.891	0.24	3.04	0.565	Globocassidulina spp.
WG-A5	303-U1308C-26H-3,128-130	3280.76	260.79	2019-05-24 01:57	22.792	-0.143	-0.785	0.82	3.69	0.664	Pyrgo spp.
WG-A5	303-U1308C-26H-3,128-130	3280.76	260.79	2019-05-24 03:51	22.846	-0.184	-0.581	1.22	3.4	0.619	Pyrgo spp.
WG-A5	303-U1308C-26H-3,128-130	3280.76	260.79	2019-06-03 22:33	21.221	-0.177	-0.496	0.12	2.95	0.64	Globocassidulina spp.
WG-A5	303-U1308C-26H-3,128-130	3280.76	260.79	2019-06-14 08:45	22.021	-0.179	0.188	0.81	3.2	0.637	Pyrgo spp.
WG-A5	303-U1308C-26H-3,128-130	3280.76	260.79	2019-08-08 02:25	21.416	-0.17	-0.603	0.72	2.67	0.66	Cibicidoides mundulus
WG-A5	303-U1308C-26H-3,128-130	3280.76	260.79	2019-11-12 23:54	21.455	-0.191	1.367	0.8	2.68	0.647	Cibicidoides mundulus
WG-A5	303-U1308C-26H-3,128-130	3280.76	260.79	2019-12-04 04:31	21.478	-0.126	0.598	0.56	2.86	0.723	Laticarinina pauperata
WG-A5	303-U1308C-26H-3,128-130	3280.76	260.79	2020-01-26 19:24	21.303	-0.181	0.625	0.2	3.11	0.653	Globocassidulina spp.
WG-A5	303-U1308C-26H-3,128-130	3280.76	260.79	2020-06-30 23:27	21.391	-0.279	0.392	0.87	2.83	0.624	Cibicidoides spp.
WG-A5	303-U1308C-26H-3,128-130	3280.76	260.79	2020-07-06 23:47	22.302	-0.356	-0.927	1.08	3.61	0.558	Pyrgo spp.
WG-A5	303-U1308C-26H-3,128-130	3280.76	260.79	2020-08-01 20:14	21.32	-0.224	1.068	0.12	3.12	0.623	Globocassidulina spp.
WG-A5	303-U1308C-26H-3,128-130	3280.76	260.79	2020-10-28 08:12	21.403	-0.214	0.441	0.79	2.67	0.658	Cibicidoides mundulus
WG-A5	303-U1308C-26H-3,128-130	3280.76	260.79	2020-11-04 01:28	21.116	-0.206	0.446	0.48	2.71	0.672	Cibicidoides spp.
WG-A5	303-U1308C-26H-3,128-130	3280.76	260.79	2020-11-14 04:00	21.424	-0.201	0.463	0.69	2.79	0.682	Cibicidoides spp.
WG-A5	303-U1308C-26H-3,128-130	3280.76	260.79	2022-01-26 01:22	21.397	-0.223	0.965	0.4	2.97	0.629	Globocassidulina spp.
WG-A5	303-U1308C-26H-3,128-130	3280.76	260.79	2022-01-29 18:39	21.109	-0.211	2.855	-0.02	3.08	0.638	Globocassidulina spp.
WG-A6	303-U1308C-26H-3,148-150	3282.79	260.99	2022-02-24 03:53	21.556	-0.14	2.299	0.73	2.73	0.705	Cibicidoides spp.
WG-A6	303-U1308C-26H-3,148-150	3282.79	260.99	2022-03-02 15:02	21.598	-0.13	1.019	0.78	2.73	0.712	Cibicidoides spp.
WG-A6	303-U1308C-26H-3,148-150	3282.79	260.99	2022-03-07 22:23	21.06	-0.17	0.455	0.11	2.88	0.677	Melonis spp.
WG-A7	303-U1308C-26H-4,0-2	3282.99	261.01	2022-02-12 22:03	20.422	-0.212	1.091	-1.25	3.59	0.63	Oridorsalis umbonatus
WG-A7	303-U1308C-26H-4,0-2	3282.99	261.01	2022-02-24 23:23	21.678	-0.176	0.809	0.78	2.84	0.671	Cibicidoides spp.
WG-A7	303-U1308C-26H-4,0-2	3282.99	261.01	2022-03-02 23:15	21.605	-0.204	0.958	0.83	2.77	0.635	Cibicidoides spp.
WG-A7	303-U1308C-26H-4,0-2	3282.99	261.01	2022-03-07 15:34	20.211	-0.176	0.473	-1.07	3.18	0.67	Oridorsalis umbonatus
XH-B1	303-U1308C-26H-4,61-63	3291.4	261.62	2019-06-14 18:31	21.407	-0.165	-0.328	-0.21	3.55	0.651	Globocassidulina spp.
XH-B1	303-U1308C-26H-4,61-63	3291.4	261.62	2019-08-07 17:08	21.152	-0.183	-0.81	-0.64	3.73	0.646	Uvigerina spp.
XH-B1	303-U1308C-26H-4,61-63	3291.4	261.62	2019-08-24 05:45	20.427	-0.18	0.714	-1.29	3.62	0.645	Oridorsalis umbonatus
XH-B1	303-U1308C-26H-4,61-63	3291.4	261.62	2019-10-24 22:13	21.217	-0.213	0.055	-0.63	3.76	0.621	Uvigerina spp.
XH-B1	303-U1308C-26H-4,61-63	3291.4	261.62	2019-11-13 04:48	21.154	-0.188	0.122	-0.64	3.76	0.651	Uvigerina spp.
XH-B1	303-U1308C-26H-4,61-63	3291.4	261.62	2019-12-21 00:39	21.201	-0.215	-0.535	-0.15	3.35	0.622	Globocassidulina spp.
XH-B10	303-U1308C-26H-4,119-120,5	3299.82	262.2	2019-08-08 01:16	20.784	-0.149	-0.353	-0.96	3.64	0.683	Oridorsalis umbonatus
XH-B10	303-U1308C-26H-4,119-120,5	3299.82	262.2	2019-08-24 23:04	21.394	-0.118	1.029	-0.07	3.34	0.713	Globocassidulina spp.
XH-B10	303-U1308C-26H-4,119-120,5	3299.82	262.2	2019-09-14 11:12	22.391	-0.203	0.967	0.46	3.83	0.637	Pyrgo spp.
XH-B10	303-U1308C-26H-4,119-120,5	3299.82	262.2	2019-11-26 04:34	21.102	-0.219	-0.19	-0.04	3.17	0.628	Globocassidulina spp.
XH-B10	303-U1308C-26H-4,119-120,5	3299.82	262.2	2020-02-12 22:54	21.278	-0.15	0.789	-0.06	3.28	0.676	Globocassidulina spp.
XH-B2	303-U1308C-26H-4,61-63	3292.41	261.69	2019-06-14 19:40	21.056	-0.099	-0.157	-0.33	3.26	0.723	Globocassidulina spp.
XH-B2	303-U1308C-26H-4,61-63	3292.41	261.69	2019-08-28 20:44	21.352	-0.128	0.138	-0.62	3.82	0.711	Uvigerina spp.
XH-B2	303-U1308C-26H-4,61-63	3292.41	261.69	2019-08-29 21:05	20.329	-0.205	-0.02	-1.54	3.79	0.636	Oridorsalis umbonatus
XH-B2	303-U1308C-26H-4,61-63	3292.41	261.69	2019-10-26 11:45	22.679	-0.159	0.184	0.34	4.22	0.691	Pyrgo spp.
XH-B2	303-U1308C-26H-4,61-63	3292.41	261.69	2020-08-02 02:31	23.198	-0.185	0.35	0.67	4.36	0.666	Pyrgo spp.
XH-B2	303-U1308C-26H-4,61-63	3292.41	261.69	2020-08-06 23:03	22.87	-0.2	2.242	0.55	4.14	0.651	Pyrgo spp.
XH-B3	303-U1308C-26H-4,77-79	3293.73	261.78	2019-06-15 00:28	21.592	-0.164	-0.28	-0.3	3.81	0.648	Globocassidulina spp.
XH-B3	303-U1308C-26H-4,77-79	3293.73	261.78	2019-08-08 01:51	22.322	-0.165	-0.525	0.22	4.01	0.666	Pyrgo spp.
XH-B3	303-U1308C-26H-4,77-79	3293.73	261.78	2019-09-09 22:58	21.284	-0.126	2.57	-0.69	3.82	0.705	Uvigerina spp.
XH-B3	303-U1308C-26H-4,77-79	3293.73	261.78	2019-11-13 19:17	21.118	-0.207	0.325	-0.67	3.76	0.63	Uvigerina spp.
XH-B3	303-U1308C-26H-4,77-79	3293.73	261.78	2020-02-02 14:13	21.342	-0.148	1.964	-0.53	3.81	0.682	Uvigerina spp.
XH-B3	303-U1308C-26H-4,77-79	3293.73	261.78	2020-07-08 23:40	20.974	-0.262	-0.427	-0.66	3.9	0.655	Uvigerina spp.
XH-B3	303-U1308C-26H-4,77-79	3293.73	261.78	2020-08-08 03:08	21.843	-0.2	0.686	-0.06	3.73	0.652	Globocassidulina spp.
XH-B3	303-U1308C-26H-4,77-79	3293.73	261.78	2020-10-28 00:58	21.089	-0.204	0.503	-0.69	3.76	0.668	Uvigerina spp.
XH-B3	303-U1308C-26H-4,77-79	3293.73	261.78	2020-11-03 20:23	21.435	-0.186	0.265	-0.54	3.96	0.695	Uvigerina spp.
XH-B3	303-U1308C-26H-4,77-79	3293.73	261.78	2020-11-10 17:06	21.344	-0.208	0.345	-0.44	3.79	0.674	Globocassidulina spp.
XH-B3	303-U1308C-26H-4,77-79	3293.73	261.78	2022-01-26 02:05	21.285	-0.207	0.548	-0.65	3.84	0.647	Uvigerina spp.
XH-B4	303-U1308C-26H-4,85-87	3294.89	261.86	2019-06-15 01:36	21.524	-0.125	-0.254	-0.19	3.61	0.691	Globocassidulina spp.
XH-B4	303-U1308C-26H-4,85-87	3294.89	261.86	2019-08-08 06:55	21.471	-0.152	-0.881	-0.18	3.56	0.681	Globocassidulina spp.
XH-B4	303-U1308C-26H-4,85-87	3294.89	261.86	2019-09-09 18:21	21.497	-0.198	-0.165	-0.14	3.57	0.63	Globocassidulina spp.
XH-B4	303-U1308C-26H-4,85-87	3294.89	261.86	2019-11-19 22:12	21.5	-0.184	1.632	-0.07	3.53	0.654	Globocassidulina spp.
XH-B5	303-U1308C-26H-4,90-92	3295.62	261.91	2019-06-15 02:55	21.442	-0.115	-0.625	-0.15	3.48	0.701	Globocassidulina spp.
XH-B5	303-U1308C-26H-4,90-92	3295.62	261.91	2019-08-08 05:40	22.814	-0.151	-0.675	0.53	4.18	0.682	Pyrgo spp.
XH-B5	303-U1308C-26H-4,90-92	3295.62	261.91	2019-09-04 03:17	20.655	-0.177	1.267	-1.1	3.64	0.67	Oridorsalis umbonatus
XH-B5	303-U1308C-26H-4,90-92	3295.62	261.91	2019-12-02 21:28	21.01	-0.195	3.003	-0.67	3.64	0.644	Uvigerina spp. spp.
XH-B5	303-U1308C-26H-4,90-92	3295.62	261.91	2020-01-26 17:57	21.344	-0.131	1.164	-0.45	3.72	0.707	Uvigerina spp. spp.
XH-B5	303-U1308C-26H-4,90-92	3295.62	261.91	2020-07-02 22:16	21.008	-0.25	2.944	0.11	3.13	0.656	Cibicidoides spp.
XH-B5	303-U1308C-26H-4,90-92	3295.62	261.91	2020-11-13 22:16	21.008	-0.239	0.234	-0.73	3.76	0.639	Uvigerina spp. spp.
XH-B6	303-U1308C-26H-4,97-99	3296.63	261.98	2019-08-13 19:17	20.302	-0.225	-0.775	-1.24	3.53	0.597	Oridorsalis umbonatus
XH-B6	303-U1308C-26H-4,97-99	3296.63	261.98	2019-08-28 05:33	21.572	-0.153	0.34	-0.08	3.55	0.679	Globocassidulina spp.
XH-B6	303-U1308C-26H-4,97-99	3296.63	261.98	2019-09-03 21:16	22.254	-0.211	2.296	0.08	4.1	0.631	Pyrgo spp.
XH-B6	303-U1308C-26H-4,97-99	3296.63	261.98	2020-02-02 13:33	21.418	-0.194	1.899	-0.15	3.57	0.633	Globocassidulina spp.
XH-B7	303-U1308C-26H-4,101-103	3297.21	262.02	2019-08-14 01:01	21.502	-0.142	-0.358	-0.13	3.54	0.683	Globocassidulina spp.
XH-B7	303-U1308C-26H-4,101-103	3297.21	262.02	2019-08-23 11:57	20.506	-0.203	0.983	-1.04	3.48	0.619	Oridorsalis umbonatus
XH-B7	303-U1308C-26H-4,101-103	3297.21	262.02	2019-09-11 19:59	21.195	-0.19	-0.312	-0.54	3.63	0.643	Uvigerina spp. spp.
XH-B7	303-U1308C-26H-4,101-103	3297.21	262.02	2019-12-03 17:33	20.56	-0.201	0.048	-0.99	3.51	0.641	Oridorsalis umbonatus
XH-B7	303-U1308C-26H-4,101-103	3297.21	262.02	2019-12-20 23:56	21.121	-0.196	-0.988	-0.56	3.64	0.643	Uvigerina spp. spp.
XH-B7	303-U1308C-26H-4,101-103	3297.21	262.02	2020-06-30 21:16	20.806	-0.265	1.033	-0.55	3.59	0.64	Uvigerina spp. spp.
XH-B7	303-U1308C-26H-4,101-103	3297.21	262.02	2020-11-05 00:25	22.458	-0.214	0.203	0.38	4.09	0.664	Pyrgo spp.
XH-B8	303-U1308C-26H-4,112-114	3298.81	262.13	2019-08-27 03:44	22.23	-0.191	-0.252	0.51	3.66	0.64	Pyrgo spp.
XH-B8	303-U1308C-26H-4,112-114	3298.81	262.13	2019-08-28 00:12	22.917	-0.178	0.271	0.75	4.08	0.652	Pyrgo spp.
XH-B8	303-U1308C-26H-4,112-114	3298.81	262.13	2019-09-12 02:44	21.616	-0.209	1.117	-0.07	3.61	0.62	Globocassidulina spp.
XH-B8	303-U1308C-26H-4,112-114	3298.81	262.13	2020-02-02 21:09	21.186	-0.146	2.234	-0.57	3.7	0.682	Gyroidinoides spp.
XH-B8	303-U1308C-26H-4,112-114	3298.81	262.13	2020-07-28 02:39	22.762	-0.171	0.466	0.5	4.08	0.673	Pyrgo spp.
XH-B8	303-U1308C-26H-4,112-114	3298.81	262.13	2020-08-04 17:13	21.237	-0.188	1.252	-0.65	3.71	0.662	Gyroidinoides spp.
XH-B9	303-U1308C-26H-4,116-118	3299.39	262.17	2019-08-26 17:06	21.613	-0.143	-0.582	-0.01	3.51	0.688	Globocassidulina spp.
XH-B9	303-U1308C-26H-4,116-118	3299.39	262.17	2019-08-29 07:13	21.31	-0.194	-0.222	0.16	3.1	0.643	Globocassidulina spp.
XH-B9	303-U1308C-26H-4,116-118	3299.39	262.17	2019-09-14 05:08	21.182	-0.215	9.591	-0.07	3.19	0.624	Globocassidulina spp.
XH-B9	303-U1308C-26H-4,116-118	3299.39	262.17	2019-11-20 04:30	22.204	-0.178	0.424	0.18	3.97	0.661	Pyrgo spp.
XH-B9	303-U1308C-26H-4,116-118	3299.39	262.17	2020-07-31 06:57	21.435	-0.224	0.346	-0.07	3.41	0.622	Globocassidulina spp.
ZI-C1	303-U1308C-26H-5,87-89	3327	263.38	2019-08-13 21:06	20.824	-0.228	-0.659	0.31	2.56	0.594	Cibicidoides wuellerstorfi
ZI-C1	303-U1308C-26H-5,87-89	3327	263.38	2019-08-24 00:00	21.48	-0.182	0.195	0.9	2.55	0.643	Cibicidoides wuellerstorfi
ZI-C1	303-U1308C-26H-5,87-89	3327	263.38	2019-09-10 05:41	21.369	-0.16	0.88	0.77	2.54	0.668	Cibicidoides wuellerstorfi
ZI-C1	303-U1308C-26H-5,87-89	3327	263.38	2019-10-25 06:53	19.894	-0.209	1.326	-0.99	2.83	0.629	Oridorsalis umbonatus
ZI-C1	303-U1308C-26H-5,87-89	3327	263.38	2019-11-13 00:35	19.815	-0.175	0.972	-0.96	2.76	0.664	Oridorsalis umbonatus
ZI-C1	303-U1308C-26H-5,87-89	3327	263.38	2019-11-27 02:46	20.179	-0.171	0.749	-0.81	2.97	0.678	Oridorsalis umbonatus
ZI-C1	303-U1308C-26H-5,87-89	3327	263.38	2019-12-03 23:20	20.092	-0.169	1.192	-0.86	2.91	0.675	Oridorsalis umbonatus
ZI-C1	303-U1308C-26H-5,87-89	3327	263.38	2019-12-21 03:36	19.919	-0.182	-0.184	-0.94	2.84	0.659	Oridorsalis umbonatus
ZI-C1	303-U1308C-26H-5,87-89	3327	263.38	2020-02-02 07:58	20.865	-0.223	2.01	0.3	2.64	0.603	Globocassidulina spp.
ZI-C1	303-U1308C-26H-5,87-89	3327	263.38	2020-07-28 14:36	21.451	-0.202	0.215	0.77	2.6	0.642	Cibicidoides mundulus
ZI-C1	303-U1308C-26H-5,87-89	3327	263.38	2020-10-28 07:28	20.777	-0.201	0.367	0.16	2.65	0.673	Globocassidulina spp.
ZI-C1	303-U1308C-26H-5,87-89	3327	263.38	2021-01-12 02:35	21.017	-0.157	12.053	0.26	2.8	0.723	Globocassidulina spp.
ZI-C1	303-U1308C-26H-5,87-89	3327	263.38	2021-01-23 15:39	21.061	-0.239	1.136	0.21	2.96	0.63	Globocassidulina spp.
ZI-C1	303-U1308C-26H-5,87-89	3327	263.38	2021-02-25 01:09	20.802	-0.2	0.496	0.15	2.78	0.654	Globocassidulina spp.
ZI-C2	303-U1308C-26H-5,118-119,5	3330.05	263.69	2019-08-24 10:15	20.113	-0.2	0.55	-0.92	2.99	0.625	Oridorsalis umbonatus
ZI-C2	303-U1308C-26H-5,118-119,5	3330.05	263.69	2019-08-26 23:51	20.086	-0.199	0.43	-0.94	2.99	0.631	Oridorsalis umbonatus
ZI-C2	303-U1308C-26H-5,118-119,5	3330.05	263.69	2019-09-04 07:08	20.916	-0.173	0.611	0.27	2.59	0.676	Globocassidulina spp.
ZI-C2	303-U1308C-26H-5,118-119,5	3330.05	263.69	2019-10-26 23:38	20.564	-0.184	-0.151	-0.06	2.58	0.659	Globocassidulina spp.
ZI-C3	303-U1308C-26H-5,137-138,5	3331.92	263.88	2019-08-14 01:39	22.784	-0.161	-0.401	1.16	3.57	0.664	Pyrgo spp.
ZI-C3	303-U1308C-26H-5,137-138,5	3331.92	263.88	2019-08-27 05:10	21.585	-0.176	0.456	0.87	2.69	0.656	Cibicidoides wuellerstorfi
ZI-C3	303-U1308C-26H-5,137-138,5	3331.92	263.88	2019-08-28 19:05	20.021	-0.198	-0.418	-0.96	2.93	0.636	Oridorsalis umbonatus
ZI-C3	303-U1308C-26H-5,137-138,5	3331.92	263.88	2019-11-14 05:49	19.993	-0.14	-0.176	-1.08	3.01	0.708	Oridorsalis umbonatus
ZI-C3	303-U1308C-26H-5,137-138,5	3331.92	263.88	2019-11-25 22:10	19.968	-0.189	5.495	-1	2.96	0.661	Oridorsalis umbonatus
ZI-C3	303-U1308C-26H-5,137-138,5	3331.92	263.88	2020-01-27 05:20	22.772	-0.197	0.405	1.31	3.48	0.636	Pyrgo spp.
ZI-C3	303-U1308C-26H-5,137-138,5	3331.92	263.88	2020-07-02 20:19	22.111	-0.268	0.402	0.8	3.55	0.633	Pyrgo spp.
ZI-C3	303-U1308C-26H-5,137-138,5	3331.92	263.88	2020-11-18 05:17	20.885	-0.173	0.524	-0.1	2.99	0.709	Globocassidulina spp.
ZI-C3	303-U1308C-26H-5,137-138,5	3331.92	263.88	2020-11-25 18:29	22.534	-0.229	0.176	1.08	3.51	0.642	Pyrgo spp.
ZI-C3	303-U1308C-26H-5,137-138,5	3331.92	263.88	2020-11-30 19:44	21.192	-0.174	0.193	0.08	3.09	0.712	Globocassidulina spp.
ZI-C3	303-U1308C-26H-5,137-138,5	3331.92	263.88	2020-12-08 22:19	21.248	-0.221	0.156	0.16	3.13	0.656	Globocassidulina spp.
ZI-C3	303-U1308C-26H-5,137-138,5	3331.92	263.88	2020-12-19 08:34	20.83	-0.219	0.963	0.33	2.56	0.654	Globocassidulina spp.
ZI-C3	303-U1308C-26H-5,137-138,5	3331.92	263.88	2021-02-09 02:03	20.976	-0.187	0.141	0.13	2.94	0.688	Globocassidulina spp.
ZI-C4	303-U1308C-26H-6,3-4,5	3333.5	264.04	2019-08-27 18:05	21.395	-0.177	0.323	0.65	2.71	0.654	Cibicidoides smundulus
ZI-C4	303-U1308C-26H-6,3-4,5	3333.5	264.04	2019-08-30 03:39	20.576	-0.122	0.383	-0.68	3.13	0.73	Oridorsalis umbonatus
ZI-C4	303-U1308C-26H-6,3-4,5	3333.5	264.04	2019-09-03 22:57	21.512	-0.191	2.638	0.8	2.68	0.654	Cibicidoides wuellerstorfi
ZI-C4	303-U1308C-26H-6,3-4,5	3333.5	264.04	2019-11-20 00:19	21.259	-0.187	1.309	0.67	2.6	0.652	Cibicidoides mundulus
ZI-C4	303-U1308C-26H-6,3-4,5	3333.5	264.04	2020-02-02 19:47	23.119	-0.17	2.158	1.48	3.64	0.657	Pyrgo spp.
ZI-C4	303-U1308C-26H-6,3-4,5	3333.5	264.04	2020-06-30 19:17	22.917	-0.258	0.436	1.55	3.62	0.647	Pyrgo spp.
ZI-C4	303-U1308C-26H-6,3-4,5	3333.5	264.04	2020-10-29 00:58	22.854	-0.195	0.231	1.26	3.61	0.682	Pyrgo spp.
ZI-C4	303-U1308C-26H-6,3-4,5	3333.5	264.04	2020-11-10 17:50	21.073	-0.229	0.257	0.19	2.96	0.651	Globocassidulina spp.
ZI-C4	303-U1308C-26H-6,3-4,5	3333.5	264.04	2020-11-13 23:41	21.091	-0.218	0.549	0.08	3.06	0.662	Globocassidulina spp.
ZI-C4	303-U1308C-26H-6,3-4,5	3333.5	264.04	2020-11-18 22:51	21.035	-0.224	0.421	0.19	2.89	0.655	Globocassidulina spp.
ZI-C4	303-U1308C-26H-6,3-4,5	3333.5	264.04	2020-11-25 04:53	20.95	-0.216	0.269	0.14	2.87	0.66	Globocassidulina spp.
ZI-C4	303-U1308C-26H-6,3-4,5	3333.5	264.04	2020-12-16 23:34	21.044	-0.228	2.108	0.11	3	0.646	Globocassidulina spp.
ZI-C4	303-U1308C-26H-6,3-4,5	3333.5	264.04	2021-02-01 21:40	20.726	-0.242	0.513	0.02	2.84	0.626	Globocassidulina spp.
ZI-C5	303-U1308C-26H-6,22-23,5	3335.37	264.23	2019-08-22 21:02	21.309	-0.224	0.19	0.73	2.59	0.599	Cibicidoides wuellerstorfi
ZI-C5	303-U1308C-26H-6,22-23,5	3335.37	264.23	2019-08-28 02:34	20.59	-0.176	0.613	-0.78	3.29	0.654	Oridorsalis umbonatus
ZI-C5	303-U1308C-26H-6,22-23,5	3335.37	264.23	2019-08-29 00:24	20.451	-0.187	0.723	-0.87	3.25	0.65	Oridorsalis umbonatus
ZI-C5	303-U1308C-26H-6,22-23,5	3335.37	264.23	2019-11-12 18:19	21.325	-0.207	0.768	0.6	2.75	0.629	Cibicidoides mundulus
ZI-C5	303-U1308C-26H-6,22-23,5	3335.37	264.23	2019-12-03 04:27	21.337	-0.178	1.107	0.72	2.62	0.661	Cibicidoides wuellerstorfi
ZI-C5	303-U1308C-26H-6,22-23,5	3335.37	264.23	2019-12-20 23:11	20.948	-0.174	-0.774	-0.18	3.1	0.668	Globocassidulina spp.
ZI-C5	303-U1308C-26H-6,22-23,5	3335.37	264.23	2020-02-13 00:57	21.103	-0.136	0.569	-0.26	3.29	0.691	Oridorsalis umbonatus
ZI-C5	303-U1308C-26H-6,22-23,5	3335.37	264.23	2020-07-30 21:41	22.975	-0.197	0.522	1	3.84	0.651	Pyrgo spp.
ZI-C5	303-U1308C-26H-6,22-23,5	3335.37	264.23	2020-11-03 17:24	21.176	-0.199	0.265	0.04	3.17	0.68	Globocassidulina spp.
ZI-C5	303-U1308C-26H-6,22-23,5	3335.37	264.23	2020-11-28 09:30	21.249	-0.231	0.259	0.18	3.11	0.646	Globocassidulina spp.
ZI-C5	303-U1308C-26H-6,22-23,5	3335.37	264.23	2020-12-22 22:13	20.768	-0.221	0.483	-0.18	3.01	0.65	Globocassidulina spp.
ZI-C5	303-U1308C-26H-6,22-23,5	3335.37	264.23	2021-01-23 04:24	21.012	-0.225	0.56	-0.15	3.24	0.642	Globocassidulina spp.
ZI-C5	303-U1308C-26H-6,22-23,5	3335.37	264.23	2021-02-17 18:23	21.159	-0.199	0.435	0	3.25	0.657	Globocassidulina spp.
ZI-C5	303-U1308C-26H-6,22-23,5	3335.37	264.23	2021-02-20 09:42	21.072	-0.217	0.64	-0.02	3.21	0.637	Globocassidulina spp.

## Sheet: Table S2 849 D47
Table S2: Δ47 sample measurement data from ODP Site 849
Sample label	Age (ka BP)	Depth (mcd)	Date and time of measurement	d47 WG (PBL) (‰)	D47 WG (PBL) (‰)	D48 WG (PBL) (‰)	d13C VPDB (Final) (‰)	d18O VPDB (Final) (‰)	D47 CDES (Final) (‰)	Species
138-849D-8H-5,104-106	3189	88.66	2017-12-29 19:40	21.024	-0.141	-1.314	0.28	2.76	0.64	Cibicidoides spp.
138-849D-8H-5,104-106	3189	88.66	2017-12-30 00:51	21.002	-0.123	-1.219	0.31	2.69	0.661	Cibicidoides spp.
138-849D-8H-5,104-106	3189	88.66	2017-12-30 06:10	21.088	-0.11	-0.824	0.31	2.77	0.678	Cibicidoides spp.
138-849D-8H-5,104-106	3189	88.66	2017-12-30 11:22	21.03	-0.097	-1.056	-0.51	3.48	0.696	Mixed infaunal
138-849D-8H-5,104-106	3189	88.66	2017-12-30 20:18	20.616	-0.119	-1.126	-0.8	3.36	0.669	Mixed infaunal
138-849D-8H-5,104-106	3189	88.66	2017-12-31 01:29	20.742	-0.139	-1.313	-0.56	3.28	0.643	Mixed infaunal
138-849D-8H-5,104-106	3189	88.66	2017-12-31 06:46	20.935	-0.135	-1.373	-0.55	3.44	0.649	Mixed infaunal
138-849D-8H-5,104-106	3189	88.66	2017-12-31 12:06	21.041	-0.077	-0.807	-0.53	3.46	0.721	Mixed infaunal
138-849D-8H-5,104-106	3189	88.66	2017-12-31 20:40	22.079	-0.141	-0.989	0.49	3.55	0.639	Mixed epifaunal
138-849D-8H-5,104-106	3189	88.66	2018-01-01 01:55	22.259	-0.134	-0.706	0.59	3.61	0.648	Mixed epifaunal
138-849D-8H-5,104-106	3189	88.66	2018-01-01 07:16	22.284	-0.128	-0.497	0.66	3.54	0.657	Mixed epifaunal
138-849D-8H-5,104-106	3189	88.66	2018-01-01 18:04	22.093	-0.129	-1.381	0.57	3.44	0.656	Mixed epifaunal
138-849D-8H-5,104-106	3189	88.66	2018-01-02 04:00	22.148	-0.147	-0.851	0.52	3.56	0.63	Mixed epifaunal
138-849D-8H-5,104-106	3189	88.66	2018-01-02 09:55	22.396	-0.103	-0.621	0.61	3.68	0.684	Mixed epifaunal
138-849D-8H-5,112-114	3192	88.73	2020-11-30 18:16	21.06	-0.202	0.52	0.32	2.78	0.681	Cibicidoides spp.
138-849D-8H-5,112-114	3192	88.73	2020-12-08 16:41	20.637	-0.212	0.414	-0.62	3.27	0.666	Favocassidulina spp.
138-849D-8H-5,112-114	3192	88.73	2020-12-17 02:23	20.945	-0.199	0.877	0.25	2.74	0.679	Cibicidoides spp.
138-849D-8H-5,112-114	3192	88.73	2020-12-18 21:13	21.722	-0.222	0.813	0.37	3.38	0.651	Pyrgo spp.
138-849D-8H-5,112-114	3192	88.73	2020-12-20 23:47	22.002	-0.212	0.471	0.51	3.51	0.662	Pyrgo spp.
138-849D-8H-5,112-114	3192	88.73	2020-12-23 03:09	21.915	-0.207	0.479	0.51	3.46	0.667	Pyrgo spp.
138-849D-8H-5,112-114	3192	88.73	2021-01-11 16:41	21.798	-0.22	0.5	0.48	3.4	0.656	Pyrgo spp.
138-849D-8H-5,112-114	3192	88.73	2021-01-22 18:46	21.775	-0.197	4.535	0.43	3.4	0.671	Pyrgo spp.
138-849D-8H-5,112-114	3192	88.73	2021-02-02 05:37	21.777	-0.197	1.58	0.48	3.38	0.674	Pyrgo spp.
138-849D-8H-5,122-124	3195	88.83	2017-12-03 23:22	20.666	-0.077	-6.801	-0.71	3.31	0.695	Oridorsalis spp.
138-849D-8H-5,122-124	3195	88.83	2017-12-04 08:42	20.194	-0.116	-5.436	-1.13	3.3	0.642	Oridorsalis spp.
138-849D-8H-5,122-124	3195	88.83	2017-12-04 11:31	20.191	-0.086	-5.709	-1.1	3.25	0.679	Oridorsalis spp.
138-849D-8H-5,122-124	3195	88.83	2017-12-11 16:47	20.349	-0.104	-4.195	-0.69	2.96	0.654	Favocassidulina spp.
138-849D-8H-5,122-124	3195	88.83	2017-12-11 22:04	20.953	-0.089	-3.772	-0.53	3.39	0.672	Favocassidulina spp.
138-849D-8H-5,122-124	3195	88.83	2017-12-12 03:16	20.742	-0.132	-4.333	-0.56	3.26	0.618	Favocassidulina spp.
138-849D-8H-5,122-124	3195	88.83	2017-12-12 05:37	21.231	-0.121	-3.528	-0.3	3.46	0.632	Mixed infaunal
138-849D-8H-5,122-124	3195	88.83	2017-12-12 08:33	20.691	-0.145	-4.77	-0.56	3.23	0.604	Favocassidulina spp.
138-849D-8H-5,122-124	3195	88.83	2017-12-12 10:48	21.087	-0.13	-3.272	-0.43	3.46	0.623	Mixed infaunal
138-849D-8H-5,122-124	3195	88.83	2017-12-14 19:53	21.092	-0.11	-3.124	-0.4	3.39	0.656	Mixed infaunal
138-849D-8H-5,122-124	3195	88.83	2017-12-15 01:08	21.321	-0.086	-2.017	-0.34	3.53	0.684	Mixed infaunal
138-849D-8H-5,122-124	3195	88.83	2017-12-15 06:30	21.053	-0.11	-2.607	-0.4	3.35	0.654	Mixed infaunal
138-849D-8H-5,122-124	3195	88.83	2017-12-15 11:11	21.249	-0.067	-2.567	-0.41	3.5	0.711	Mixed infaunal
138-849D-8H-5,122-124	3195	88.83	2017-12-17 17:55	20.956	-0.114	-1.478	-0.58	3.41	0.66	Mixed infaunal
138-849D-8H-5,122-124	3195	88.83	2017-12-17 23:13	21.134	-0.123	-2.296	-0.36	3.39	0.646	Mixed infaunal
138-849D-8H-5,122-124	3195	88.83	2017-12-21 17:09	20.65	-0.103	-1.34	-0.73	3.29	0.675	Oridorsalis spp.
138-849D-8H-5,122-124	3195	88.83	2018-01-01 18:38	20.909	-0.111	-1.371	-0.06	2.88	0.678	Cibicidoides spp.
138-849D-8H-5,122-124	3195	88.83	2018-01-01 23:51	21.144	-0.106	-0.645	0.33	2.74	0.682	Cibicidoides spp.
138-849D-8H-5,122-124	3195	88.83	2018-01-02 05:08	21.207	-0.101	-0.969	0.37	2.75	0.688	Cibicidoides spp.
138-849D-8H-5,136-138	3201	88.97	2020-10-27 18:20	20.338	-0.208	0.523	-0.44	2.81	0.664	Cibicidoides spp.
138-849D-8H-5,136-138	3201	88.97	2020-10-28 19:43	20.505	-0.165	0.382	-0.78	3.25	0.714	Uvigerina spp.
138-849D-8H-5,136-138	3201	88.97	2020-11-03 18:54	20.195	-0.184	0.42	-1.09	3.29	0.696	Uvigerina spp.
138-849D-8H-5,136-138	3201	88.97	2020-11-04 17:50	20.657	-0.195	0.277	-0.02	2.72	0.684	Cibicidoides spp.
138-849D-8H-5,136-138	3201	88.97	2020-11-10 20:46	20.925	-0.225	0.246	0.31	2.71	0.655	Cibicidoides spp.
138-849D-8H-5,136-138	3201	88.97	2020-11-11 18:07	20.411	-0.192	0.171	-0.84	3.25	0.693	Uvigerina spp.
138-849D-8H-5,136-138	3201	88.97	2020-11-17 17:03	20.731	-0.186	0.484	-0.54	3.27	0.693	Favocassidulina spp.
138-849D-8H-5,136-138	3201	88.97	2020-11-18 19:21	20.669	-0.191	0.411	-0.61	3.27	0.692	Favocassidulina spp.
138-849D-8H-5,136-138	3201	88.97	2020-11-24 15:36	20.752	-0.219	0.244	-0.49	3.27	0.657	Favocassidulina spp.
138-849D-8H-5,136-138	3201	88.97	2020-11-25 19:51	20.56	-0.209	0.369	-0.64	3.21	0.664	Favocassidulina spp.
138-849D-8H-5,136-138	3201	88.97	2020-11-28 03:10	20.603	-0.209	0.286	-0.62	3.22	0.673	Favocassidulina spp.
138-849D-8H-6,46-48	3221	89.57	2017-12-22 16:26	20.88	-0.092	-2.267	-0.68	3.44	0.69	Favocassidulina spp.
138-849D-8H-6,46-48	3221	89.57	2017-12-22 21:39	21.189	-0.094	-1.492	-0.48	3.55	0.692	Favocassidulina spp.
138-849D-8H-6,46-48	3221	89.57	2017-12-23 03:01	20.961	-0.092	-1.463	-0.68	3.49	0.695	Favocassidulina spp.
138-849D-8H-6,46-48	3221	89.57	2017-12-23 08:14	20.916	-0.099	-1.88	-0.67	3.45	0.686	Favocassidulina spp.
138-849D-8H-6,46-48	3221	89.57	2017-12-25 18:16	20.933	-0.107	-1.25	0.01	2.82	0.683	Cibicidoides spp.
138-849D-8H-6,46-48	3221	89.57	2017-12-25 23:38	21.062	-0.099	-2.003	0.19	2.78	0.692	Cibicidoides spp.
138-849D-8H-6,46-48	3221	89.57	2017-12-26 05:29	21.044	-0.129	-1.664	0.1	2.89	0.652	Cibicidoides spp.
138-849D-8H-6,46-48	3221	89.57	2017-12-26 10:50	21.112	-0.115	-1.679	0.26	2.8	0.671	Cibicidoides spp.
138-849D-8H-6,46-48	3221	89.57	2017-12-27 19:12	20.807	-0.107	-1.951	-0.73	3.44	0.683	Mixed infaunal
138-849D-8H-6,46-48	3221	89.57	2017-12-28 00:24	20.672	-0.126	-1.063	-0.79	3.4	0.659	Mixed infaunal
138-849D-8H-6,46-48	3221	89.57	2017-12-28 05:43	20.508	-0.079	-1.727	-1.03	3.44	0.721	Mixed infaunal
138-849D-8H-6,46-48	3221	89.57	2017-12-28 10:23	20.79	-0.105	-1.425	-0.78	3.5	0.687	Mixed infaunal
138-849D-8H-6,46-48	3221	89.57	2017-12-28 19:14	20.279	-0.089	-1.441	-0.91	3.12	0.708	Mixed infaunal
138-849D-8H-6,46-48	3221	89.57	2017-12-29 01:03	20.763	-0.098	-1.341	-0.85	3.55	0.693	Mixed epifaunal
138-849D-8H-6,46-48	3221	89.57	2017-12-29 05:49	20.541	-0.106	-1.472	-0.73	3.23	0.684	Mixed
138-849D-8H-6,56-58	3224	89.67	2017-12-11 17:20	20.911	-0.098	-3.842	-0.64	3.44	0.661	Favocassidulina spp.
138-849D-8H-6,56-58	3224	89.67	2017-12-11 22:38	20.82	-0.073	-3.555	-0.76	3.45	0.693	Favocassidulina spp.
138-849D-8H-6,56-58	3224	89.67	2017-12-18 17:15	20.738	-0.116	-2.632	-0.83	3.46	0.658	Mixed infaunal
138-849D-8H-6,56-58	3224	89.67	2017-12-18 20:10	20.099	-0.093	-2.957	-1.36	3.33	0.687	Oridorsalis spp.
138-849D-8H-6,56-58	3224	89.67	2017-12-18 23:39	21.045	-0.104	-2.149	-0.57	3.51	0.672	Mixed infaunal
138-849D-8H-6,56-58	3224	89.67	2017-12-19 05:25	20.901	-0.086	-2.026	-0.73	3.51	0.696	Mixed infaunal
138-849D-8H-6,56-58	3224	89.67	2017-12-21 16:01	20.069	-0.091	-1.863	-1.4	3.35	0.691	Oridorsalis spp.
138-849D-8H-6,56-58	3224	89.67	2017-12-21 20:38	20.87	-0.116	-1.868	-0.64	3.42	0.66	Mixed infaunal
138-849D-8H-6,56-58	3224	89.67	2017-12-26 17:46	20.957	-0.086	-1.344	0.06	2.8	0.708	Cibicidoides spp.
138-849D-8H-6,56-58	3224	89.67	2017-12-26 23:05	21.147	-0.096	-1.64	0.27	2.79	0.698	Cibicidoides spp.
138-849D-8H-6,56-58	3224	89.67	2017-12-27 04:16	21.05	-0.102	-1.705	0.16	2.81	0.691	Cibicidoides spp.
138-849D-8H-6,56-58	3224	89.67	2017-12-27 08:54	20.45	-0.12	-1.588	-0.01	2.41	0.668	Cibicidoides spp.
138-849D-8H-6,56-58	3224	89.67	2017-12-27 17:58	21.097	-0.095	-1.556	0.19	2.84	0.7	Cibicidoides spp.
138-849D-8H-6,56-58	3224	89.67	2018-01-01 19:11	21.068	-0.12	-0.991	-0.62	3.58	0.667	Mixed infaunal
138-849D-8H-6,56-58	3224	89.67	2018-01-02 00:32	20.883	-0.128	-0.832	-0.72	3.5	0.654	Mixed infaunal
138-849D-8H-6,56-58	3224	89.67	2018-01-02 05:43	20.948	-0.124	-0.678	-0.68	3.53	0.658	Mixed infaunal
138-849C-9H-1,76-78	3247	90.37	2017-12-12 03:49	20.842	-0.107	-3.938	-0.09	2.88	0.649	Laticarinina spp.
138-849C-9H-1,76-78	3247	90.37	2017-12-12 09:07	20.964	-0.139	-2.939	-0.04	2.99	0.612	Laticarinina spp.
138-849C-9H-1,76-78	3247	90.37	2017-12-17 18:36	21.062	-0.088	-2.205	-0.62	3.53	0.693	Favocassidulina spp.
138-849C-9H-1,76-78	3247	90.37	2017-12-17 23:48	20.858	-0.118	-2.289	-0.65	3.4	0.652	Favocassidulina spp.
138-849C-9H-1,76-78	3247	90.37	2017-12-18 17:49	21.24	-0.112	-2.546	-0.33	3.47	0.663	Mixed infaunal
138-849C-9H-1,76-78	3247	90.37	2017-12-19 00:13	21.021	-0.109	-2.628	-0.53	3.45	0.666	Mixed infaunal
138-849C-9H-1,76-78	3247	90.37	2017-12-19 06:00	20.632	-0.113	-2.322	-0.98	3.51	0.661	Mixed infaunal
138-849C-9H-1,76-78	3247	90.37	2017-12-21 21:12	21.046	-0.123	-2.403	-0.43	3.4	0.651	Mixed infaunal
138-849C-9H-1,76-78	3247	90.37	2017-12-26 19:00	20.15	-0.119	-2.015	-1.18	3.24	0.666	Oridorsalis spp.
138-849C-9H-1,76-78	3247	90.37	2017-12-27 00:13	20.128	-0.132	-2.013	-1.21	3.25	0.651	Oridorsalis spp.
138-849C-9H-1,76-78	3247	90.37	2017-12-27 05:30	20.131	-0.129	-2.044	-1.22	3.25	0.656	Oridorsalis spp.
138-849C-9H-1,76-78	3247	90.37	2017-12-28 18:00	20.861	-0.103	-1.137	0.03	2.8	0.69	Cibicidoides spp.
138-849C-9H-1,76-78	3247	90.37	2017-12-28 23:54	21.138	-0.044	-1.175	0.3	2.77	0.762	Cibicidoides spp.
138-849C-9H-1,76-78	3247	90.37	2017-12-29 04:34	21.676	-0.084	-1.046	-0.02	3.63	0.712	Unknown?
138-849C-9H-1,76-78	3247	90.37	2017-12-29 09:53	21.016	-0.081	-0.559	0.21	2.76	0.716	Cibicidoides spp.
138-849C-9H-1,76-78	3247	90.37	2017-12-29 13:19	21.127	-0.112	-0.514	0.35	2.76	0.677	Cibicidoides spp.
138-849C-9H-1,78-80	3248	90.39	2020-06-30 16:28	20.605	-0.203	2.774	0.2	2.63	0.705	Cibicidoides spp.
138-849C-9H-1,78-80	3248	90.39	2020-08-18 20:31	21.082	-0.219	1.519	0.22	2.77	0.641	Cibicidoides spp.
138-849C-9H-1,78-80	3248	90.39	2020-10-27 20:34	20.767	-0.228	-0.106	0.08	2.75	0.642	Cibicidoides spp.
138-849C-9H-1,78-80	3248	90.39	2020-11-04 18:34	21.016	-0.211	0.477	-0.34	3.38	0.667	Globocassidulina spp.
138-849C-9H-1,78-80	3248	90.39	2020-11-14 04:45	21.012	-0.224	0.349	-0.34	3.39	0.657	Globocassidulina spp.
138-849C-9H-1,78-80	3248	90.39	2020-11-26 00:42	20.725	-0.16	0.279	0.06	2.66	0.717	Cibicidoides spp.
138-849C-9H-1,80-82	3249	90.41	2020-07-06 18:27	20.619	-0.271	-0.234	0.1	2.83	0.648	Cibicidoides spp.
138-849C-9H-1,80-82	3249	90.41	2020-07-27 21:42	21.08	-0.212	0.185	-0.42	3.37	0.627	Globocassidulina spp.
138-849C-9H-1,80-82	3249	90.41	2020-11-03 23:16	20.349	-0.175	0.387	-1.04	3.38	0.707	Globocassidulina spp.
138-849C-9H-1,80-82	3249	90.41	2020-11-10 22:49	21.933	-0.214	0.05	0.36	3.61	0.667	Pyrgo spp.
138-849C-9H-1,80-82	3249	90.41	2020-11-17 17:43	21.877	-0.186	0.549	0.46	3.42	0.692	Pyrgo spp.
138-849C-9H-1,80-82	3249	90.41	2020-11-24 16:16	20.722	-0.186	0.32	-0.28	3.01	0.692	Cibicidoides spp.
138-849C-9H-1,84-86	3251	90.45	2020-07-30 03:20	20.913	-0.204	1.071	0.1	2.72	0.642	Cibicidoides spp.
138-849C-9H-1,84-86	3251	90.45	2020-11-11 22:26	20.75	-0.186	0.071	-0.59	3.33	0.701	Globocassidulina spp.
138-849C-9H-1,86-88	3252	90.47	2017-12-29 20:14	20.679	-0.119	-1.111	-0.53	3.18	0.668	Unknown?
138-849C-9H-1,86-88	3252	90.47	2017-12-30 01:25	20.926	-0.111	-1.01	-0.18	3.08	0.677	Unknown?
138-849C-9H-1,86-88	3252	90.47	2017-12-30 06:43	20.613	-0.09	-1.845	-0.02	2.6	0.703	Cibicidoides spp.
138-849C-9H-1,86-88	3252	90.47	2017-12-30 11:55	20.77	-0.084	-1.267	-0.76	3.45	0.712	Favocassidulina spp.
138-849C-9H-1,86-88	3252	90.47	2017-12-30 20:53	20.413	-0.141	-1.278	-0.78	3.17	0.641	Mixed infaunal
138-849C-9H-1,86-88	3252	90.47	2017-12-31 02:02	19.896	-0.111	-0.857	-1.37	3.2	0.679	Mixed infaunal
138-849C-9H-1,86-88	3252	90.47	2017-12-31 07:20	20.805	-0.119	-1.413	-0.18	2.95	0.669	Mixed epifaunal
138-849C-9H-1,86-88	3252	90.47	2017-12-31 12:39	20.699	-0.108	-0.965	-0.15	2.8	0.682	Mixed epifaunal
138-849C-9H-1,86-88	3252	90.47	2017-12-31 21:14	20.616	-0.121	-0.752	-0.28	2.85	0.663	Mixed epifaunal
138-849C-9H-1,86-88	3252	90.47	2018-01-01 02:35	22.344	-0.12	-0.636	0.77	3.51	0.667	Mixed epifaunal
138-849C-9H-1,86-88	3252	90.47	2018-01-01 07:50	20.69	-0.095	-1.366	-0.22	2.81	0.7	Mixed epifaunal
138-849C-9H-1,86-88	3252	90.47	2018-01-01 23:17	21.788	-0.114	-0.787	0.51	3.19	0.672	Mixed
138-849C-9H-1,86-88	3252	90.47	2018-01-02 04:35	20.827	-0.104	-1.782	-0.35	3.07	0.683	Mixed
138-849C-9H-1,86-88	3252	90.47	2018-01-02 10:28	20.491	-0.126	-1.339	-0.3	2.73	0.655	Mixed epifaunal
138-849C-9H-1,92-94	3254	90.53	2020-08-04 18:35	20.653	-0.187	1.11	-1.07	3.55	0.664	Gyroidinoides spp.
138-849C-9H-1,96-98	3256	90.57	2017-12-22 17:00	20.451	-0.109	-2.631	-0.98	3.33	0.669	Oridorsalis spp.
138-849C-9H-1,96-98	3256	90.57	2017-12-22 22:13	20.835	-0.115	-1.634	0	2.77	0.664	Cibicidoides spp.
138-849C-9H-1,96-98	3256	90.57	2017-12-23 03:34	20.867	-0.104	-1.658	-0.98	3.7	0.678	Oridorsalis spp.
138-849C-9H-1,96-98	3256	90.57	2017-12-24 14:26	21.012	-0.109	-1.706	0.18	2.73	0.678	Cibicidoides spp.
138-849C-9H-1,96-98	3256	90.57	2017-12-24 19:46	20.791	-0.095	-2.166	0.05	2.64	0.697	Cibicidoides spp.
138-849C-9H-1,96-98	3256	90.57	2017-12-25 00:59	20.696	-0.089	-1.611	0.07	2.51	0.706	Cibicidoides spp.
138-849C-9H-1,96-98	3256	90.57	2017-12-25 18:57	20.801	-0.09	-1.102	-0.69	3.34	0.705	Favocassidulina spp.
138-849C-9H-1,96-98	3256	90.57	2017-12-26 00:12	20.602	-0.13	-2.533	-0.86	3.37	0.652	Favocassidulina spp.
138-849C-9H-1,96-98	3256	90.57	2017-12-26 06:10	20.932	-0.121	-1.321	-0.56	3.4	0.662	Mixed infaunal
138-849C-9H-1,96-98	3256	90.57	2017-12-26 11:24	20.461	-0.115	-1.778	-0.89	3.27	0.672	Mixed infaunal
138-849C-9H-1,96-98	3256	90.57	2017-12-27 23:49	20.015	-0.089	-2.627	-1.05	2.98	0.707	Mixed epifaunal
138-849C-9H-1,96-98	3256	90.57	2017-12-28 05:03	20.808	-0.114	-0.992	-0.68	3.43	0.675	Mixed epifaunal
138-849C-9H-1,98-100	3257	90.59	2020-07-02 17:38	21.315	-0.304	0.651	0.15	3.44	0.596	Pyrgo spp.
138-849C-9H-1,104-106	3259	90.65	2020-08-12 03:08	20.496	-0.218	0.449	-1.04	3.39	0.641	Gyroidinoides spp.
138-849C-9H-1,104-106	3259	90.65	2020-08-19 22:21	20.767	-0.231	1.504	-0.76	3.4	0.626	Globocassidulina spp.
138-849C-9H-1,132-134	3271	90.93	2020-08-20 22:35	21.119	-0.202	3.379	-0.57	3.53	0.655	Globocassidulina spp.
138-849C-9H-1,136-138	3272	90.97	2020-08-11 20:31	21.096	-0.22	0.445	-0.58	3.54	0.638	Globocassidulina spp.
138-849C-9H-1,136-138	3272	90.97	2020-08-22 09:06	21.318	-0.179	3.72	0.22	2.95	0.679	Cibicidoides spp.
138-849C-9H-1,140-142	3274	91.01	2020-07-01 03:28	20.162	-0.233	2.19	-1.13	3.49	0.669	Gyroidinoides spp.
138-849C-9H-1,144-146	3275	91.05	2020-07-03 04:13	20.1	-0.275	1.076	-1.08	3.4	0.63	Uvigerina spp.
138-849C-9H-2,0-2	3277	91.11	2020-08-19 00:49	20.8	-0.19	3.144	-0.21	2.87	0.674	Cibicidoides spp.
138-849C-9H-2,0-2	3277	91.11	2020-08-22 22:44	21.191	-0.163	4.568	-0.59	3.57	0.7	Globocassidulina spp.
138-849C-9H-2,0-2	3277	91.11	2020-10-28 22:00	21.062	-0.181	0.315	-0.69	3.72	0.697	Globocassidulina spp.
138-849C-9H-2,0-2	3277	91.11	2020-11-10 23:31	20.878	-0.21	0.465	0.12	2.82	0.671	Cibicidoides spp.
138-849C-9H-2,0-2	3277	91.11	2020-11-17 18:24	20.014	-0.187	0.3	-1.47	3.46	0.692	P. bulloides
138-849C-9H-2,0-2	3277	91.11	2020-12-08 17:21	20.892	-0.186	0.328	-0.66	3.54	0.694	Globocassidulina spp.
138-849C-9H-2,0-2	3277	91.11	2021-01-23 10:38	21.739	-0.208	0.398	0.33	3.46	0.661	Pyrgo spp.
138-849C-9H-2,4-6	3279	91.15	2020-08-27 06:13	20.822	-0.191	1.878	-0.86	3.49	0.679	Uvigerina spp.
138-849C-9H-2,4-6	3279	91.15	2020-10-28 06:00	20.708	-0.215	0.221	0.01	2.74	0.657	Cibicidoides spp.
138-849C-9H-2,4-6	3279	91.15	2020-11-24 16:57	20.172	-0.225	0.129	-1.43	3.61	0.651	Gyroidinoides spp.
138-849C-9H-2,4-6	3279	91.15	2020-12-11 00:28	20.838	-0.238	-0.199	-0.02	2.92	0.636	Cibicidoides spp.
138-849C-9H-2,4-6	3279	91.15	2021-02-02 04:57	20.736	-0.21	1.263	0.01	2.83	0.66	Cibicidoides spp.
138-849C-9H-2,4-6	3279	91.15	2021-02-17 21:53	20.405	-0.169	1.394	-1.01	3.45	0.687	Uvigerina spp.
138-849C-9H-2,4-6	3279	91.15	2021-02-20 18:27	20.549	-0.198	0.707	-0.83	3.44	0.658	Globocassidulina spp.
138-849C-9H-2,8-10	3280	91.19	2020-07-29 23:40	20.674	-0.16	0.289	-0.97	3.46	0.69	Globocassidulina spp.
138-849C-9H-2,8-10	3280	91.19	2020-08-03 06:13	21.088	-0.21	1.297	0.11	2.87	0.643	Cibicidoides spp.
138-849C-9H-2,8-10	3280	91.19	2020-11-05 01:53	20.385	-0.228	0.168	-1.02	3.44	0.649	Uvigerina spp.
138-849C-9H-2,8-10	3280	91.19	2020-11-11 23:08	20.584	-0.164	0.355	-0.91	3.45	0.724	Uvigerina spp.
138-849C-9H-2,8-10	3280	91.19	2020-11-26 00:01	20.404	-0.198	0.366	-1.07	3.47	0.677	Uvigerina spp.
138-849C-9H-2,8-10	3280	91.19	2020-11-30 22:51	20.877	-0.181	0.233	0.07	2.82	0.704	Cibicidoides spp.
138-849C-9H-2,8-10	3280	91.19	2020-12-21 01:57	22.181	-0.205	0.945	0.57	3.63	0.67	Pyrgo spp.
138-849C-9H-2,8-10	3280	91.19	2021-02-09 02:45	20.516	-0.187	0.184	-0.92	3.5	0.688	Globocassidulina spp.
138-849C-9H-2,12-14	3281	91.23	2020-08-14 04:03	20.563	-0.212	1.624	-1.06	3.48	0.645	Uvigerina spp.
138-849C-9H-2,12-14	3281	91.23	2020-11-19 05:13	21.02	-0.206	0.353	0.14	2.9	0.675	Cibicidoides spp.
138-849C-9H-2,12-14	3281	91.23	2020-12-17 05:20	20.466	-0.219	3.827	-1.01	3.48	0.656	Uvigerina spp.
138-849C-9H-2,12-14	3281	91.23	2021-01-11 17:28	20.803	-0.23	-0.183	-0.61	3.49	0.646	Globocassidulina spp.
138-849C-9H-2,12-14	3281	91.23	2021-01-23 09:55	20.222	-0.187	0.506	-1.11	3.35	0.682	Uvigerina spp.
138-849C-9H-2,12-14	3281	91.23	2021-02-20 02:25	20.808	-0.154	0.864	-0.63	3.47	0.705	Globocassidulina spp.
138-849C-9H-2,16-18	3282	91.27	2020-07-07 18:30	20.239	-0.344	-1.097	-0.98	3.56	0.568	Uvigerina spp.
138-849C-9H-2,16-18	3282	91.27	2020-11-04 05:50	20.362	-0.185	0.489	-1	3.36	0.696	Uvigerina spp.
138-849C-9H-2,16-18	3282	91.27	2020-11-14 06:13	20.809	-0.231	0.354	0.08	2.8	0.648	Cibicidoides spp.
138-849C-9H-2,16-18	3282	91.27	2020-11-28 03:52	20.81	-0.224	0.221	0.02	2.83	0.656	Cibicidoides spp.
138-849C-9H-2,16-18	3282	91.27	2020-12-18 20:29	20.672	-0.213	0.907	-0.8	3.47	0.661	Uvigerina spp.
138-849C-9H-2,16-18	3282	91.27	2020-12-23 02:25	20.793	-0.233	0.541	0.04	2.84	0.639	Cibicidoides spp.
138-849C-9H-2,16-18	3282	91.27	2021-02-09 03:27	20.581	-0.184	0.399	-0.84	3.48	0.691	Globocassidulina spp.
138-849C-9H-2,50-52	3291	91.61	2020-07-03 06:16	20.783	-0.218	0.971	-1.19	4.1	0.69	Uvigerina spp.
138-849C-9H-2,50-52	3291	91.61	2020-08-25 03:52	21.088	-0.167	1.032	-1.2	4.06	0.695	Uvigerina spp.
138-849C-9H-2,54-56	3292	91.65	2020-07-08 17:39	20.758	-0.259	0.405	-1.11	4.11	0.659	Uvigerina spp.
138-849C-9H-2,54-56	3292	91.65	2020-09-25 00:06	21.039	-0.153	3.406	-1.27	4.06	0.709	Uvigerina spp.
138-849C-9H-2,54-56	3292	91.65	2022-01-26 00:01	21.146	-0.195	1.193	-0.4	3.46	0.66	Cibicidoides spp.
138-849C-9H-2,54-56	3292	91.65	2022-01-29 22:05	20.942	-0.171	1.177	-0.69	3.52	0.682	Cibicidoides spp.
138-849C-9H-2,58-60	3292	91.69	2017-09-22 05:08	22.651	-0.179	-0.157	-0.49	4.18	0.66	Mixed epifaunal
138-849C-9H-2,58-60	3292	91.69	2017-09-22 10:17	22.283	-0.134	-0.019	-0.38	3.68	0.706	Mixed
138-849C-9H-2,58-60	3292	91.69	2017-09-27 17:26	21.782	-0.177	0.113	-1.14	3.98	0.674	Mixed infaunal
138-849C-9H-2,58-60	3292	91.69	2017-09-30 17:22	21.614	-0.16	0.025	-1.42	4.09	0.685	Mixed infaunal
138-849C-9H-2,58-60	3292	91.69	2017-09-30 22:30	21.895	-0.085	0.178	-1.15	4.02	0.765	Mixed infaunal
138-849C-9H-2,58-60	3292	91.69	2017-10-03 06:25	21.917	-0.19	-0.152	-1	4	0.65	Mixed infaunal
138-849C-9H-2,58-60	3292	91.69	2017-10-04 20:21	21.688	-0.156	-0.004	-0.64	3.43	0.677	Cibicidoides spp.
138-849C-9H-2,58-60	3292	91.69	2017-10-05 01:24	21.068	-0.186	0.073	-1.51	3.68	0.645	Mixed
138-849C-9H-2,58-60	3292	91.69	2017-10-05 06:27	21.888	-0.138	0.549	-0.68	3.64	0.696	Mixed epifaunal
138-849C-9H-2,58-60	3292	91.69	2017-12-02 01:39	20.686	-0.116	-7.852	-1.47	4.05	0.652	Oridorsalis spp.
138-849C-9H-2,58-60	3292	91.69	2017-12-02 06:15	20.551	-0.096	-7.718	-1.6	4.02	0.677	Oridorsalis spp.
138-849C-9H-2,58-60	3292	91.69	2017-12-03 16:59	20.667	-0.09	-6.509	-1.59	4.16	0.679	Oridorsalis spp.
138-849C-9H-2,62-64	3293	91.73	2020-07-01 05:37	20.656	-0.251	0.551	-1.12	3.97	0.651	Globocassidulina spp.
138-849C-9H-2,62-64	3293	91.73	2020-07-08 04:27	20.85	-0.234	-0.316	-0.37	3.48	0.686	Cibicidoides spp.
138-849C-9H-2,62-64	3293	91.73	2020-08-08 05:13	21.21	-0.191	0.263	-0.36	3.39	0.661	Cibicidoides spp.
138-849C-9H-2,62-64	3293	91.73	2020-10-27 21:16	20.376	-0.177	0.533	-1.72	4.02	0.697	O. umbonatus
138-849C-9H-2,62-64	3293	91.73	2020-11-03 18:09	20.918	-0.217	0.505	-0.43	3.39	0.66	Cibicidoides spp.
138-849C-9H-2,62-64	3293	91.73	2020-11-19 05:55	20.496	-0.21	0.216	-1.44	3.91	0.671	Gyroidinoides spp.
138-849C-9H-2,62-64	3293	91.73	2020-11-24 17:46	21.033	-0.212	-0.144	-0.35	3.4	0.664	Cibicidoides spp.
138-849C-9H-2,62-64	3293	91.73	2020-11-30 23:34	21.092	-0.213	0.243	-1.03	4.1	0.668	Globocassidulina spp.
138-849C-9H-2,62-64	3293	91.73	2020-12-17 06:03	20.964	-0.195	1.539	-1.04	3.97	0.683	Globocassidulina spp.
138-849C-9H-2,66-68	3294	91.77	2017-04-12 19:02	21.223	-0.127	0.616	-1.7	3.99	0.691	Oridorsalis spp.
138-849C-9H-2,66-68	3294	91.77	2017-04-12 23:40	20.967	-0.146	0.677	-1.85	3.9	0.672	Oridorsalis spp.
138-849C-9H-2,66-68	3294	91.77	2017-04-13 04:39	21.095	-0.127	0.514	-1.79	3.96	0.694	Oridorsalis spp.
138-849C-9H-2,66-68	3294	91.77	2017-04-13 08:45	21.192	-0.154	0.88	-1.65	3.95	0.663	Oridorsalis spp.
138-849C-9H-2,66-68	3294	91.77	2017-04-13 15:32	21.684	-0.141	0.247	-1.19	3.97	0.679	Mixed
138-849C-9H-2,66-68	3294	91.77	2017-04-13 19:55	21.296	-0.175	0.594	-1.51	3.94	0.639	Mixed infaunal
138-849C-9H-2,66-68	3294	91.77	2017-04-14 00:31	21.786	-0.13	1.074	-1.09	3.95	0.689	Mixed infaunal
138-849C-9H-2,66-68	3294	91.77	2017-04-14 05:29	21.745	-0.143	0.598	-1.08	3.92	0.675	Mixed infaunal
138-849C-9H-2,66-68	3294	91.77	2017-04-14 13:48	22.346	-0.163	0.567	-0.74	4.19	0.651	Mixed epifaunal
138-849C-9H-2,66-68	3294	91.77	2017-04-14 19:40	22.789	-0.179	1.428	-0.18	4.1	0.639	Mixed epifaunal
138-849C-9H-2,66-68	3294	91.77	2017-05-23 01:11	22.42	-0.218	1.419	-0.46	4.11	0.604	Mixed epifaunal
138-849C-9H-2,66-68	3294	91.77	2017-05-23 01:41	22.389	-0.141	0.609	-0.41	3.96	0.685	Mixed
138-849C-9H-2,66-68	3294	91.77	2017-05-25 14:49	21.559	-0.12	-0.959	-0.98	3.68	0.698	Mixed epifaunal
138-849C-9H-2,66-68	3294	91.77	2017-05-25 19:42	21.767	-0.141	-0.08	-0.48	3.43	0.676	Mixed epifaunal
138-849C-9H-2,66-68	3294	91.77	2017-05-26 00:28	21.618	-0.122	-0.485	-0.61	3.38	0.698	Mixed epifaunal
138-849C-9H-2,66-68	3294	91.77	2017-05-26 05:13	21.749	-0.17	-0.287	-0.47	3.42	0.646	Mixed epifaunal
138-849C-9H-2,66-68	3294	91.77	2017-05-26 10:07	21.74	-0.114	0.941	-0.73	3.61	0.703	Mixed epifaunal
138-849C-9H-2,66-68	3294	91.77	2017-05-26 15:26	21.61	-0.103	0.304	-0.47	3.22	0.716	Cibicidoides spp.
138-849C-9H-2,70-72	3295	91.81	2020-07-31 23:21	21.032	-0.215	1.824	-0.41	3.33	0.632	Cibicidoides spp.
138-849C-9H-2,70-72	3295	91.81	2020-11-28 04:33	20.747	-0.199	0.156	-0.52	3.25	0.683	Cibicidoides spp.
138-849C-9H-2,70-72	3295	91.81	2020-12-18 21:56	20.94	-0.211	0.873	-0.39	3.34	0.663	Cibicidoides spp.
138-849C-9H-2,74-76	3296	91.85	2020-08-14 02:39	21.091	-0.222	1.914	-0.4	3.37	0.634	Cibicidoides spp.
138-849C-9H-2,74-76	3296	91.85	2020-08-22 01:43	20.997	-0.162	2.919	-1.26	4.02	0.698	Uvigerina spp.
138-849C-9H-2,74-76	3296	91.85	2020-11-05 07:02	20.76	-0.23	0.309	-0.48	3.29	0.646	Cibicidoides spp.
138-849C-9H-2,74-76	3296	91.85	2020-11-11 00:12	20.57	-0.205	0.438	-1.38	3.93	0.676	Gyroidinoides spp.
138-849C-9H-2,74-76	3296	91.85	2020-12-08 18:04	20.83	-0.191	0.438	-0.49	3.32	0.689	Cibicidoides spp.
138-849C-9H-2,74-76	3296	91.85	2020-12-11 01:08	20.828	-0.233	0.37	-0.45	3.31	0.642	Cibicidoides spp.
138-849C-9H-2,82-84	3298	91.93	2020-08-22 12:19	21.027	-0.198	13.329	-1.08	3.91	0.659	Uvigerina spp.
138-849C-9H-2,82-84	3298	91.93	2020-11-14 07:42	20.688	-0.177	0.465	-0.51	3.18	0.708	Cibicidoides spp.
138-849C-9H-2,82-84	3298	91.93	2020-11-17 19:10	21.015	-0.217	0.061	-0.94	3.95	0.658	Uvigerina spp.
138-849C-9H-2,86-88	3299	91.97	2020-07-29 22:56	20.771	-0.186	0.357	-1.32	3.91	0.662	Uvigerina spp.
138-849C-9H-2,86-88	3299	91.97	2020-11-12 00:31	20.488	-0.201	0.4	-0.98	3.46	0.684	Melonis spp.
138-849C-9H-2,86-88	3299	91.97	2020-11-25 22:38	20.776	-0.216	0.37	-1	3.77	0.658	Globocassidulina spp.
138-849C-9H-2,130-132	3316	92.41	2020-07-02 22:53	19.689	-0.244	0.746	-1.04	2.95	0.662	Melonis spp.
138-849C-9H-2,130-132	3316	92.41	2020-08-02 03:20	20.335	-0.209	0.336	-1.12	3.32	0.64	Globocassidulina spp.
138-849C-9H-2,130-132	3316	92.41	2020-08-06 02:56	20.979	-0.188	1.419	-0.65	3.46	0.666	Globocassidulina spp.
138-849C-9H-2,130-132	3316	92.41	2020-10-28 02:23	20.701	-0.208	0.367	-0.17	2.9	0.664	Cibicidoides spp.
138-849C-9H-2,130-132	3316	92.41	2020-10-29 01:42	20.505	-0.198	0.547	-0.82	3.32	0.679	Globocassidulina spp.
138-849C-9H-2,130-132	3316	92.41	2020-11-03 19:41	20.628	-0.237	0.029	-0.72	3.41	0.638	Globocassidulina spp.
138-849C-9H-2,130-132	3316	92.41	2020-11-14 21:16	20.57	-0.236	0.224	-0.14	2.78	0.642	Cibicidoides spp.
138-849C-9H-2,130-132	3316	92.41	2020-11-25 21:57	20.704	-0.218	0.645	-0.14	2.9	0.655	Cibicidoides spp.
138-849C-9H-2,132-134	3317	92.43	2020-07-31 03:22	20.846	-0.198	0.527	-0.02	2.77	0.65	Cibicidoides spp.
138-849C-9H-2,132-134	3317	92.43	2020-08-03 21:39	20.837	-0.142	3.213	-0.1	2.76	0.712	Cibicidoides spp.
138-849C-9H-2,132-134	3317	92.43	2020-08-20 02:34	20.455	-0.188	0.404	-1.09	3.37	0.67	Gyroidinoides spp.
138-849C-9H-2,134-136	3318	92.45	2017-12-11 18:02	20.54	-0.107	-4.325	-0.86	3.3	0.649	Mixed infaunal
138-849C-9H-2,134-136	3318	92.45	2017-12-15 00:34	21.969	-0.111	-1.954	0.6	3.29	0.653	Mixed epifaunal
138-849C-9H-2,134-136	3318	92.45	2017-12-17 19:10	21.079	-0.11	-3.532	0	2.97	0.664	Mixed epifaunal
138-849C-9H-2,134-136	3318	92.45	2017-12-18 00:21	21.783	-0.094	-2.068	0.39	3.28	0.683	Mixed epifaunal
138-849C-9H-2,134-136	3318	92.45	2017-12-18 20:44	22.177	-0.144	-3.161	0.72	3.41	0.622	Mixed epifaunal
138-849C-9H-2,134-136	3318	92.45	2017-12-19 01:22	20.842	-0.12	-2.35	-0.03	2.81	0.652	Cibicidoides spp.
138-849C-9H-2,134-136	3318	92.45	2017-12-19 07:14	20.818	-0.096	-1.914	-0.05	2.79	0.683	Cibicidoides spp.
138-849C-9H-2,134-136	3318	92.45	2017-12-21 16:35	21.865	-0.101	-2.686	0.45	3.34	0.677	Mixed epifaunal
138-849C-9H-2,134-136	3318	92.45	2017-12-24 14:59	20.851	-0.12	-1.458	-0.76	3.48	0.663	Gyroidina spp.
138-849C-9H-2,134-136	3318	92.45	2017-12-24 20:20	20.441	-0.163	-2.123	-0.95	3.32	0.608	Gyroidina spp.
138-849C-9H-2,134-136	3318	92.45	2017-12-25 01:32	20.751	-0.14	-1.505	-0.88	3.51	0.639	Gyroidina spp.
138-849C-9H-2,134-136	3318	92.45	2017-12-25 06:21	20.704	-0.114	-1.247	-0.8	3.37	0.674	Gyroidina spp.
138-849C-9H-2,134-136	3318	92.45	2017-12-25 20:05	20.457	-0.114	-1.276	-1.07	3.39	0.674	Gyroidina spp.
138-849C-9H-2,134-136	3318	92.45	2017-12-26 01:21	20.736	-0.087	-1.38	-0.95	3.54	0.707	Gyroidina spp.
138-849C-9H-2,134-136	3318	92.45	2017-12-26 22:30	20.594	-0.121	-1.765	-0.85	3.35	0.665	Gyroidina spp.
138-849C-9H-2,134-136	3318	92.45	2017-12-27 03:43	20.167	-0.109	-1.473	-1.14	3.2	0.683	Gyroidina spp.
138-849C-9H-2,134-136	3318	92.45	2017-12-27 10:43	20.686	-0.095	-1.271	-0.88	3.44	0.701	Gyroidina spp.
138-849C-9H-2,136-138	3319	92.47	2017-10-03 06:57	21.025	-0.214	-0.045	-1.08	3.25	0.623	Mixed infaunal
138-849C-9H-2,136-138	3319	92.47	2017-10-04 20:53	21.33	-0.172	0.123	-0.38	2.85	0.66	Mixed epifaunal
138-849C-9H-2,136-138	3319	92.47	2017-10-05 01:56	21.969	-0.14	0.042	-0.26	3.32	0.695	Mixed epifaunal
138-849C-9H-2,136-138	3319	92.47	2017-10-05 07:10	20.807	-0.124	1.263	-1.38	3.26	0.711	Mixed
138-849C-9H-2,140-142	3321	92.51	2017-04-12 14:08	21.28	-0.149	0.367	-0.9	3.31	0.668	Favocassidulina spp.
138-849C-9H-2,140-142	3321	92.51	2017-04-12 19:34	21.355	-0.162	0.563	-0.88	3.38	0.652	Favocassidulina spp.
138-849C-9H-2,140-142	3321	92.51	2017-04-13 15:02	21.176	-0.13	0.196	-1.01	3.3	0.69	Mixed
138-849C-9H-2,140-142	3321	92.51	2017-04-14 04:59	21.109	-0.144	0.836	-0.94	3.17	0.674	Mixed
138-849C-9H-2,142-144	3322	92.53	2017-05-26 22:19	20.81	-0.228	-0.716	-1.17	3.24	0.579	Mixed infaunal
138-849C-9H-2,142-144	3322	92.53	2017-05-27 03:04	20.581	-0.14	-0.164	-1.43	3.19	0.671	Mixed infaunal
138-849C-9H-2,142-144	3322	92.53	2017-05-30 04:10	21.12	-0.141	-1.058	-0.96	3.25	0.668	Mixed infaunal
138-849C-9H-2,142-144	3322	92.53	2017-09-22 08:31	23.118	-0.214	0.067	0.71	3.53	0.622	Mixed epifaunal
138-849C-9H-2,142-144	3322	92.53	2017-09-22 18:51	21.409	-0.095	0.162	-0.2	2.64	0.752	Cibicidoides spp.
138-849C-9H-2,142-144	3322	92.53	2017-09-22 23:46	21.234	-0.161	-0.015	-0.74	3.05	0.682	Mixed
138-849C-9H-2,142-144	3322	92.53	2017-09-23 09:52	21.528	-0.191	-0.133	-0.06	2.72	0.649	Cibicidoides spp.
138-849C-9H-3,0-2	3326	92.61	2020-07-28 04:02	20.665	-0.197	0.182	-0.39	2.93	0.645	Laticarinina pauperata
138-849C-9H-3,0-2	3326	92.61	2020-08-13 23:07	20.7	-0.217	0.869	-0.87	3.44	0.64	Globocassidulina spp.
138-849C-9H-3,0-2	3326	92.61	2020-09-25 02:59	20.671	-0.225	1.766	-0.84	3.37	0.634	Globocassidulina spp.
138-849C-9H-3,0-2	3326	92.61	2020-11-05 05:34	20.518	-0.186	0.428	-0.88	3.39	0.695	Globocassidulina spp.
138-849C-9H-3,0-2	3326	92.61	2020-11-11 00:53	20.509	-0.2	0.343	-0.87	3.39	0.682	Globocassidulina spp.
138-849C-9H-3,0-2	3326	92.61	2020-11-17 19:53	20.62	-0.221	0.033	-0.82	3.46	0.653	Globocassidulina spp.
138-849C-9H-3,2-4	3327	92.63	2020-07-07 23:39	19.905	-0.245	0.675	-1.23	3.38	0.677	Gyroidinoides spp.
138-849C-9H-3,2-4	3327	92.63	2020-08-24 23:41	20.22	-0.222	1.383	-1.23	3.31	0.634	Gyroidinoides spp.
138-849C-9H-3,2-4	3327	92.63	2020-11-24 18:26	21.573	-0.221	0.264	0.11	3.5	0.654	Pyrgo spp.
138-849C-9H-3,2-4	3327	92.63	2020-11-28 05:16	22.01	-0.217	0.21	0.55	3.47	0.664	Pyrgo spp.
138-849C-9H-3,2-4	3327	92.63	2020-12-01 00:17	21.811	-0.21	0.197	0.28	3.54	0.672	Pyrgo spp.
138-849C-9H-3,4-6	3328	92.65	2020-06-30 21:58	20.4	-0.21	1.25	-0.08	2.7	0.698	Cibicidoides spp.
138-849C-9H-3,4-6	3328	92.65	2020-11-12 04:50	20.491	-0.188	0.787	-0.17	2.69	0.697	Cibicidoides spp.

## Sheet: Table S3 U1308 D47 temperatures
	Table S3: Calculated Δ47 bottom water temperatures from IODP Site U1308
Age mean (ka BP)	Age max (ka BP)	Age min (ka BP)	Depth min (mcd)	Depth max (mcd)	Replicates	Δ47 mean (‰)	Temperature mean (°C)	Temperature upper bound (95% CI) (°C)	Temperature lower bound (95%) CI (°C)
3200.77	3206.22	3196.83	254.01	254.61	31	0.654871	7.76868	9.62508	5.91228
3241.96	3244.06	3240	256.77	257.17	29	0.653862	8.0508	10.3522	5.7494
3275.37	3277.82	3273.56	260.08	260.5	34	0.657294	7.09457	10.4045	3.78467
3280.94	3282.99	3196.83	260.69	261.01	32	0.645125	10.53	14.011	7.04898
3293.09	3206.22	3291.4	261.62	261.86	27	0.662667	5.61707	8.36217	2.87197
3297.8	3299.82	3196.83	261.91	262.2	34	0.655176	7.68343	10.475	4.89183
3329.46	3331.92	3327	263.38	263.88	31	0.657452	7.05092	9.84852	4.25332
3334.47	3335.37	3196.83	264.04	264.23	27	0.655222	7.67066	9.95976	5.38156

## Sheet: Table S4 849 D47 temperatures
Table S4: Table S3: Calculated Δ47 bottom water temperatures from ODP Site 849
Age mean (ka BP)	Age max (ka BP)	Age min (ka BP)	Depth min (mcd)	Depth max (mcd)	Replicates	Δ47 mean (‰)	Temperature mean (°C)	Temperature upper bound (95% CI) (°C)	Temperature lower bound (95%) CI (°C)
3190.17	3192	3189	88.66	88.73	23	0.664261	5.18313	7.52263	2.84363
3197.2	3201	3195	88.83	88.97	30	0.667933	4.19114	6.95994	1.42234
3222.71	3224	3221	89.57	89.67	28	0.681179	0.699577	2.61568	-1.21652
3248.04	3251	3247	90.37	90.45	25	0.665	4.98262	8.30732	1.65792
3254.3	3192	3252	90.47	90.65	30	0.6721	3.07841	5.81191	2.84363
3278.9	3282	3271	90.93	91.27	40	0.667525	4.30091	7.06611	1.53571
3292.26	3293	3291	91.61	91.73	27	0.677852	1.56412	4.31062	2.84363
3295.35	3299	3294	91.77	91.97	31	0.671613	3.2078	5.9917	0.423899
3317.32	3318	3316	92.41	92.45	28	0.663393	5.41915	7.76655	2.84363
3323.61	3328	3319	92.47	92.65	28	0.66575	4.77961	8.11921	1.44001

## Sheet: Table S5 U1308 TMgCa T 
Table S5: Mg/Ca, Fe/Ca and Mn/Ca data, calculated Mg/Ca temperatures and stable isotope data from IODP Site U1308
Depth sed (mcd)	Age (ka BP)	Sample label	Mg/Ca (mmol/mol)	Fe/Ca (mmol/mol)	Mn/Ca (mmol/mol)	BWT (°C)	C. mundulus δ18O (‰ VPDB)	C. wuellerstorfi δ18O (‰ VPDB)	Foram benth δ18O (‰ VPDB)	C. wuellerstorfi δ13C (‰ VPDB)	C. mundulus δ13C (‰ VPDB)
253.81	3193.71	303-U1308C-25H-5,80-82					2.6169	2.5225	2.5697	0.9	1.009
253.91	3195.27	303-U1308C-25H-5,90-92	1.84482	0.609276	1.22203	6.08682
254.01	3196.83	303-U1308C-25H-5,100-102	1.77547	1.2029	1.03326	5.75	2.6504	2.5387	2.59455	1.123	0.825
254.11	3198.39	303-U1308C-25H-5,110-112	1.91489	0.744699	1.27207	6.4126
254.21	3199.96	303-U1308C-25H-5,120-122	2.06712	0.734342	1.22717	7.08333	2.5509	2.3997	2.4753	1.022	1.115
254.31	3201.53	303-U1308C-25H-5,130-132
254.41	3203.09	303-U1308C-25H-5,140-142	2.05757	0.729135	1.27227	7.0422	2.5448	2.5499	2.54735	0.952	0.96
254.51	3204.65	303-U1308C-25H-6,0-2					2.7092	2.4981	2.60365	1.02	0.931
254.61	3206.22	303-U1308C-25H-6,10-12	2.12517	0.820844	1.39704	7.32525		2.4322	2.4322	0.899
254.71	3207.78	303-U1308C-25H-6,20-22	1.77856	0.646942	1.24446	5.7632		2.6006	2.6006	1.038
254.81	3209.35	303-U1308C-25H-6,30-32						2.6159	2.6159	0.327
254.91	3210.91	303-U1308C-25H-6,40-42	1.87843	0.649184	0.677958	6.24189	2.5966	2.489	2.5428	0.197	1.031
255.01	3212.47	303-U1308C-25H-6,50-52	1.92826	0.576887	0.889214	6.47133	2.7275	2.4809	2.6042	0.438	0.96
255.11	3214.04	303-U1308C-25H-6,60-62					2.6727	2.4819	2.5773	0.895	0.976
255.21	3215.6	303-U1308C-25H-6,70-72	3.50991	0.584219	0.854154	11.7249	2.6636	2.6971	2.68035	1.046	0.948
255.31	3217.17	303-U1308C-25H-6,80-82	2.70048	0.586883	1.1291	9.42501		2.5773	2.5773	0.968
255.41	3218.73	303-U1308C-25H-6,90-92	1.99828	0.680389	1.11672	6.78304
255.51	3220.29	303-U1308C-25H-6,100-102					2.54125	2.5783	2.5536	0.723	0.9745
255.51	3220.29	303-U1308C-25H-7,0-2	1.9565	0.73876	1.51624	6.5975	2.7062	2.6067	2.65645	0.935	1.027
255.61	3221.86	303-U1308C-25H-7,10-12						2.5732	2.5732	1.026
255.71	3223.42	303-U1308C-25H-7,20-22	2.10124	0.788063	1.26632	7.22308	2.74275	2.5966	2.69403	0.801	1.036
255.81	3224.99	303-U1308C-25H-7,30-32					2.6707	2.7021	2.68117	0.774	1.014
255.91	3226.55	303-U1308C-25H-7,40-42	2.00574	0.721053	1.02339	6.81457		2.6544	2.6544	0.944
256.01	3228.11	303-U1308C-25H-7,50-52	1.68428	0.662448	1.16314	5.28207	2.7118	2.7306	2.71807	0.816	0.983
256.11	3229.68	303-U1308C-25H-7,60-62	1.97807	0.655577	0.858794	6.69217	2.7255	2.5986	2.6832	0.715	0.977
256.21	3231.24	303-U1308C-25H-7,70-72	1.70611	0.688742	1.14094	5.39448	2.5656	2.6433	2.5915	0.994	0.9275
256.31	3232.81	303-U1308C-25H-7,80-82					2.7641	2.5712	2.66765	0.988	1.049
256.41	3234.37	303-U1308C-25H-7,90-92	2.20613	0.582565	0.914037	7.64857	2.72095	2.628	2.68997	1.04	0.9885
256.77	3240	303-U1308-26H-1-26-28						2.4981	2.4981	0.977
256.87	3241.01	303-U1308-26H-1-36-38					2.5768		2.5768		0.9495
256.97	3242.03	303-U1308-26H-1-46-48					2.5113	2.5184	2.51367	1.046	0.8865
257.07	3243.04	303-U1308-26H-1-56-58					2.6321	2.4941	2.5631	1.018	0.913
257.17	3244.06	303-U1308-26H-1-66-68					2.7118	2.5428	2.65547	0.22	0.9555
257.27	3245.07	303-U1308C-26H-1,76-78					2.6392		2.6392		1.079
257.37	3246.08	303-U1308C-26H-1,86-88	2.45839	0.54812	0.678765	8.59582	2.65595		2.65595		0.957
257.47	3247.1	303-U1308C-26H-1,96-98	2.30548	0.45172	0.729513	8.03231	2.894		2.894		1.134
257.57	3248.11	303-U1308C-26H-1,106-108					2.6758		2.6758		0.982
257.67	3249.13	303-U1308C-26H-1,116-118
257.77	3250.14	303-U1308C-26H-1,126-128	1.6877	0.505163	0.796351	5.2953	2.60825		2.60825		0.848
257.87	3251.15	303-U1308C-26H-1,136-138	2.08569	0.33579	0.630444	7.15236	2.6179	2.5255	2.5717	0.758	0.868
257.97	3252.17	303-U1308C-26H-1,146-148	1.86849	0.460058	0.671539	6.18745	2.7752	2.6971	2.73615		0.811
258.01	3252.57	303-U1308C-26H-2,0-2	1.82624	0.654804	1.04463	5.98675		2.6341	2.6341	0.965
258.11	3253.59	303-U1308C-26H-2,10-12	2.5052	0.663449	1.34001	8.75936	2.7184	2.6037	2.66105	1.022	0.769
258.21	3254.6	303-U1308C-26H-2,20-22	2.43449	0.697341	1.04265	8.50797	2.694	2.658	2.676	0.971	0.831
258.31	3255.61	303-U1308C-26H-2,30-32	2.25908	0.702248	1.05927	7.85173	2.71885	2.6443	2.694	0.992	0.9015
258.41	3256.63	303-U1308C-26H-2,40-42	2.01222	0.653576	1.08124	6.83642	2.7407	2.61845	2.6592	0.765	0.843
258.51	3257.64	303-U1308C-26H-2,50-52	1.92146	0.647751	1.02321	6.43128	2.7762	2.59405	2.65477	0.9515	0.7
258.61	3258.65	303-U1308C-26H-2,60-62	1.81013	0.661488	1.12916	5.90748	2.81685	2.7803	2.80467	0.974	0.885
258.71	3259.67	303-U1308C-26H-2,70-72	1.85339	0.627021	0.9965	6.1144	2.8336	2.8016	2.82293	0.616	0.859
258.81	3260.68	303-U1308C-26H-2,80-82	1.88086	0.575728	0.955445	6.24317	2.896	2.7671	2.85303	0.806	0.8735
258.91	3261.7	303-U1308C-26H-2,90-92					2.827		2.827		0.878
259.01	3262.71	303-U1308C-26H-2,100-102					2.6529		2.6529	0.894	0.832
259.22	3264.84	303-U1308C-26H-2,121-123	2.37516	0.945383	1.79713	8.28903
259.48	3267.47	303-U1308C-26H-2,147-148,5	2.25807	0.837817	1.2249	7.84495
260.08	3273.56	303-U1308C-26H-3,57-59	2.14207	1.06826	1.83771	7.38112
260.5	3277.82	303-U1308C-26H-3,99-100,5	2.17536	0.795875	0.989327	7.51537
260.99	3282.79	303-U1308C-26H-3,148-150	1.79411	0.561869	0.943029	5.8241
261.25	3286.03	303-U1308C-26H-4,24-26	1.75424	0.577622	0.983064	5.62635
261.41	3288.35	303-U1308C-26H-4,40-42	1.54055	0.444015	0.876466	4.48652
262.17	3299.39	303-U1308C-26H-4,116-118	2.13701	0.941569	1.51365	7.35502
262.34	3301.85	303-U1308C-26H-4,133-135	2.02117	0.658359	0.956057	6.86554
262.57	3306.4	303-U1308C-26H-5,6-7,5	2.51079	0.947301	1.45903	8.76756
262.89	3312.8	303-U1308C-26H-5,38-40	2.00183	0.613645	1.04669	6.77897
263.45	3327.69	303-U1308C-26H-5,94-95,5	2.32556	0.704705	1.177	8.09079
263.78	3330.94	303-U1308C-26H-5,127-128,5	1.90107	0.534287	0.983397	6.32226
264.04	3333.5	303-U1308C-26H-6,3-4,5	2.87362	0.70851	0.89679	9.94602
264.38	3336.85	303-U1308C-26H-6,37-38,5	1.97852	0.541858	0.742127	6.6713
264.71	3340	303-U1308C-26H-6,70-71,5	2.0969	0.484363	0.701864	7.18046

## Sheet: Table S6 849 MgCa T
Table S6: Mg/Ca, Fe/Ca and Mn/Ca data and calculated Mg/Ca temperatures from ODP Site 849
Depth sed (mcd)	Age (ka BP)	Sample label	Mg/Ca (mmol/mol)	Fe/Ca (mmol/mol)	Mn/Ca (mmol/mol)	BWT (°C)
87.67	3160.23	138-849D-8H-5,6-8	1.46062	0.0992378	0.327141	4.05352
87.69	3160.71	138-849D-8H-5,8-10	1.61039	0.0355473	0.927232	4.90955
87.71	3161.2	138-849D-8H-5,10-12	1.26631	0.1179	1.13893	2.80084
87.73	3161.68	138-849D-8H-5,12-14	1.48711	0.0545325	0.87242	4.21053
87.77	3162.65	138-849D-8H-5,16-18	2.01863	0.474248	0.583003	6.89071
87.79	3163.13	138-849D-8H-5,18-20	1.0066	0.0342489	0.794754	0.786634
87.81	3163.62	138-849D-8H-5,20-22	1.29122	0.0623146	0.945665	2.97079
87.83	3164.1	138-849D-8H-5,22-24	0.892781	0.020416	0.893025	-0.266301
87.85	3164.59	138-849D-8H-5,24-26	1.37172	0.0493386	1.0122	3.50084
87.89	3165.59	138-849D-8H-5,28-30	1.48179	0.162967	0.729513	4.17754
87.91	3166.09	138-849D-8H-5,30-32	1.09331	0.115524	1.06165	1.51026
87.93	3166.6	138-849D-8H-5,32-34	1.38429	0.213401	0.898048	3.58007
87.95	3167.11	138-849D-8H-5,34-36	0.864268	0.0239603	0.776579	-0.552256
87.97	3167.63	138-849D-8H-5,36-38	1.11887	0.631468	0.818807	1.71236
87.99	3168.16	138-849D-8H-5,38-40	1.20476	0.131997	0.924919	2.36092
88.01	3168.69	138-849D-8H-5,40-42	1.14013	0.0925358	0.820195	1.87703
88.03	3169.23	138-849D-8H-5,42-44	1.46205	0.0808914	1.07108	4.05836
88.05	3169.78	138-849D-8H-5,44-46	1.17221	0.460981	0.952855	2.11998
88.07	3170.34	138-849D-8H-5,46-48	1.29755	0.0386259	1.02176	3.01087
88.09	3170.9	138-849D-8H-5,48-50	1.19221	0.345778	0.884259	2.26794
88.11	3171.46	138-849D-8H-5,50-52	0.869097	0.0233575	0.784571	-0.505164
88.13	3172.04	138-849D-8H-5,52-54	1.16928	0.0855662	0.858581	2.09714
88.15	3172.62	138-849D-8H-5,54-56	1.00542	0.013958	0.592311	0.772485
88.19	3173.8	138-849D-8H-5,58-60	0.78982	0.0241551	0.73841	-1.34516
88.21	3174.4	138-849D-8H-5,60-62	0.970069	0.0889651	0.783775	0.457769
88.23	3175.01	138-849D-8H-5,62-64	0.909241	0.0301132	0.858251	-0.11052
88.25	3175.62	138-849D-8H-5,64-66	0.980073	0.344064	0.504426	0.547272
88.27	3176.24	138-849D-8H-5,66-68	0.825413	0.0215216	0.802709	-0.959508
88.29	3176.87	138-849D-8H-5,68-70	1.67016	0.290982	1.1441	5.2226
88.31	3177.5	138-849D-8H-5,70-72	1.30095	0.199273	0.867751	3.03089
88.33	3178.14	138-849D-8H-5,72-74	1.01487	0.242089	0.755786	0.85225
88.35	3178.78	138-849D-8H-5,74-76	0.821159	0.0217859	0.636153	-1.00588
88.37	3179.43	138-849D-8H-5,76-78	1.06408	0.0871642	1.04357	1.2671
88.39	3180.09	138-849D-8H-5,78-80	0.901842	0.0228164	0.764731	-0.184282
88.41	3180.75	138-849D-8H-5,80-82	1.33907	0.308556	0.791187	3.28294
88.43	3181.42	138-849D-8H-5,82-84	0.995515	0.0393285	0.883335	0.682019
88.45	3182.1	138-849D-8H-5,84-86	1.47437	0.445024	0.758042	4.12669
88.47	3182.78	138-849D-8H-5,86-88	1.32317	0.0771397	1.12159	3.17729
88.49	3183.47	138-849D-8H-5,88-90	1.13349	0.162088	0.865625	1.81978
88.51	3184.16	138-849D-8H-5,90-92	1.01377	0.0499882	0.794918	0.840318
88.55	3185.56	138-849D-8H-5,94-96	0.944707	0.0154228	0.960601	0.220805
88.57	3186.27	138-849D-8H-5,96-98	1.57706	0.266434	1.26245	4.71564
88.59	3186.99	138-849D-8H-5,98-100	1.27321	0.0756098	0.937946	2.83795
88.61	3187.71	138-849D-8H-5,100-102	1.3021	0.144527	0.702494	3.03445
88.63	3188.44	138-849D-8H-5,102-104	0.974757	0.0119096	0.71233	0.494304
88.66	3189.53	138-849D-8H-5,104-106	1.34453	0.363481	1.00949	3.315
88.69	3190.64	138-849D-8H-5,108-110	1.76957	0.368446	1.10503	5.72414
88.71	3191.38	138-849D-8H-5,110-112	1.02525	0.0284475	1.14192	0.936122
88.73	3192.12	138-849D-8H-5,112-114	1.6191	0.376401	1.07194	4.94401
88.76	3193.24	138-849D-8H-5,114-116	1.01399	0.0182284	1.01402	0.838439
88.79	3194.36	138-849D-8H-5,118-120	1.56688	0.168217	1.1992	4.65552
88.81	3195.11	138-849D-8H-5,120-122	1.43345	0.185201	1.01191	3.87445
88.83	3195.86	138-849D-8H-5,122-124	1.85485	0.177456	0.994791	6.13487
88.85	3196.61	138-849D-8H-5,124-126	1.26962	0.116647	1.71378	2.80927
88.87	3197.36	138-849D-8H-5,126-128	0.993085	0.0679547	0.994204	0.654044
88.89	3198.11	138-849D-8H-5,128-130	1.36087	0.0947462	1.05943	3.41746
88.91	3198.86	138-849D-8H-5,130-132	1.22508	0.119979	0.850346	2.49508
88.93	3199.6	138-849D-8H-5,132-134	1.08106	0.0953452	1.28707	1.39773
88.95	3200.35	138-849D-8H-5,134-136	1.05068	0.0350383	1.17771	1.14742
88.97	3201.09	138-849D-8H-5,136-138	1.71144	0.748392	1.06122	5.4271
88.99	3201.83	138-849D-8H-5,138-140	0.976949	0.0254314	1.09781	0.508888
89.01	3202.57	138-849D-8H-5,140-142	1.30168	0.185123	1.12543	3.02608
89.03	3203.3	138-849D-8H-5,142-144	0.930444	0.0317573	0.791229	0.0807562
89.05	3204.03	138-849D-8H-5,144-146	1.40626	0.347702	1.04685	3.70368
89.07	3204.76	138-849D-8H-5,146-148	1.03952	0.0843652	1.10819	1.05285
89.15	3207.61	138-849D-8H-6,4-6	1.11737	0.0518304	0.781621	1.68578
89.17	3208.31	138-849D-8H-6,6-8	1.56443	0.102384	1.07021	4.63778
89.19	3209.01	138-849D-8H-6,8-10	1.21623	0.109184	1.06027	2.42916
89.21	3209.69	138-849D-8H-6,10-12	1.39878	0.0938945	1.21515	3.65571
89.23	3210.36	138-849D-8H-6,12-14	1.12727	0.108001	1.24151	1.76258
89.25	3211.04	138-849D-8H-6,14-16	1.03236	0.0183034	1.27163	0.99097
89.27	3211.7	138-849D-8H-6,16-18	1.16161	0.175448	1.17891	2.02552
89.29	3212.36	138-849D-8H-6,18-20	0.994739	0.0221083	1.20605	0.665032
89.31	3213	138-849D-8H-6,20-22	1.12719	0.0942844	1.33863	1.76139
89.34	3213.96	138-849D-8H-6,22-24	1.0934	0.199043	1.29939	1.49426
89.37	3214.9	138-849D-8H-6,26-28	1.14713	0.0525827	1.21127	1.91485
89.39	3215.52	138-849D-8H-6,28-30	1.43911	0.639425	1.18243	3.90384
89.41	3216.13	138-849D-8H-6,30-32	0.946311	0.0212532	0.839958	0.226461
89.43	3216.73	138-849D-8H-6,32-34	1.19645	0.229353	1.10743	2.28371
89.45	3217.34	138-849D-8H-6,34-36	1.12916	0.0322864	1.09833	1.77584
89.47	3217.93	138-849D-8H-6,36-38	1.15562	0.197485	1.25752	1.97889
89.49	3218.53	138-849D-8H-6,38-40	1.2831	0.0551695	1.17406	2.89668
89.51	3219.12	138-849D-8H-6,40-42	1.26805	0.304148	1.51287	2.79311
89.53	3219.7	138-849D-8H-6,42-44	1.5912	0.208385	1.35635	4.78425
89.55	3220.29	138-849D-8H-6,44-46	1.08731	0.129434	1.08645	1.44394
89.57	3220.87	138-849D-8H-6,46-48	1.41174	0.631534	0.97463	3.73433
89.59	3221.45	138-849D-8H-6,48-50	1.19627	0.0225088	1.09798	2.28146
89.61	3222.03	138-849D-8H-6,50-52	1.45034	0.698767	1.22865	3.97073
89.63	3222.61	138-849D-8H-6,52-54	1.16765	0.793337	1.26669	2.06879
89.65	3223.19	138-849D-8H-6,54-56	1.137	0.0428976	0.994231	1.83533
89.67	3223.77	138-849D-8H-6,56-58	1.5898	0.895094	1.10229	4.7757
89.69	3224.35	138-849D-8H-6,58-60	1.15208	0.0343225	1.02517	1.95069
89.71	3224.93	138-849D-8H-6,60-62	1.22893	0.208251	1.13231	2.51697
89.73	3225.52	138-849D-8H-6,62-64	0.959071	0.024468	0.947793	0.34202
89.75	3226.11	138-849D-8H-6,64-66	0.945522	0.139129	1.33438	0.217095
89.77	3226.7	138-849D-8H-6,66-68	1.34464	0.0487187	1.22772	3.30598
89.79	3227.29	138-849D-8H-6,68-70	1.09132	0.168217	1.29913	1.47483
89.81	3227.89	138-849D-8H-6,70-72	1.85017	0.118526	0.673397	6.10529
89.83	3228.49	138-849D-8H-6,72-74	0.994284	0.157804	1.35423	0.65771
89.85	3229.09	138-849D-8H-6,74-76	0.918372	0.042939	1.24536	-0.039084
89.87	3229.71	138-849D-8H-6,76-78	0.957577	0.0595262	0.887857	0.327493
89.89	3230.32	138-849D-8H-6,78-80	0.897382	0.0170328	0.986989	-0.242152
89.91	3230.95	138-849D-8H-6,80-82	0.934008	0.0876364	1.1574	0.108626
89.93	3231.58	138-849D-8H-6,82-84	1.20417	0.0260225	0.983706	2.33707
89.95	3232.22	138-849D-8H-6,84-86	1.02095	0.120543	1.17406	0.889103
89.97	3232.86	138-849D-8H-6,86-88	0.949695	0.0827124	0.921165	0.254341
89.99	3233.52	138-849D-8H-6,88-90	1.73859	0.339048	1.42456	5.55851
90.01	3234.18	138-849D-8H-6,90-92	1.53304	0.171766	1.37531	4.45466
90.03	3234.85	138-849D-8H-6,92-94	1.26276	0.336271	1.27144	2.75315
90.07	3236.23	138-849C-9H-1,46-48	1.61103	0.102994	0.818032	4.8895
90.09	3236.93	138-849C-9H-1,48-50	1.09135	0.163426	0.91129	1.47305
90.11	3237.64	138-849C-9H-1,50-52	0.94869	0.0260481	0.876188	0.244075
90.13	3238.37	138-849C-9H-1,52-54	1.35406	0.306267	1.31919	3.36482
90.15	3239.11	138-849C-9H-1,54-56	1.35887	-0.00315451	0.961996	3.39574
90.17	3239.86	138-849C-9H-1,56-58	1.37016	0.623224	2.21734	3.46817
90.19	3240.62	138-849C-9H-1,58-60	1.76469	0.129177	1.20978	5.68773
90.23	3242.17	138-849C-9H-1,62-64	1.04758	0.38928	1.23829	1.11298
90.25	3242.96	138-849C-9H-1,64-66	0.97943	0.0913084	0.968885	0.522717
90.27	3243.75	138-849C-9H-1,66-68	1.36582	0.0705279	1.40872	3.43957
90.29	3244.56	138-849C-9H-1,68-70	1.01756	0.15103	1.38703	0.857441
90.31	3245.37	138-849C-9H-1,70-72	1.25498	0.0688406	0.955914	2.69682
90.33	3246.19	138-849C-9H-1,72-74	1.19035	0.117204	1.4077	2.23288
90.35	3247.02	138-849C-9H-1,74-76	1.41468	0.0865935	1.15949	3.74723
90.37	3247.85	138-849C-9H-1,76-78	1.85904	0.831956	1.07368	6.14316
90.39	3248.69	138-849C-9H-1,78-80	1.77447	0.518304	1.24533	5.73459
90.41	3249.54	138-849C-9H-1,80-82	1.44766	0.0319516	1.1373	3.94888
90.43	3250.38	138-849C-9H-1,82-84	1.21372	0.164623	1.29822	2.40254
90.45	3251.24	138-849C-9H-1,84-86	1.10629	0.083286	1.25652	1.58944
90.51	3253.81	138-849C-9H-1,90-92	1.18873	0.314109	1.06212	2.21932
90.53	3254.67	138-849C-9H-1,92-94	1.16741	0.0558479	1.31536	2.06042
90.55	3255.53	138-849C-9H-1,94-96	1.06595	0.122354	1.3215	1.26267
90.57	3256.4	138-849C-9H-1,96-98	1.24563	0.132866	1.26176	2.62893
90.59	3257.26	138-849C-9H-1,98-100	1.07547	0.0151111	0.852811	1.3403
90.61	3258.12	138-849C-9H-1,100-102	1.25416	0.144952	1.40847	2.68848
90.65	3259.85	138-849C-9H-1,104-106	1.01629	0.0133572	0.89984	0.843297
90.67	3260.7	138-849C-9H-1,106-108	1.13794	0.0759457	0.913662	1.83487
90.69	3261.56	138-849C-9H-1,108-110	1.2089	0.0824536	0.838164	2.36536
90.71	3262.41	138-849C-9H-1,110-112	1.15027	0.0776753	0.931202	1.92907
90.73	3263.26	138-849C-9H-1,112-114	1.35962	0.058717	1.02526	3.39564
90.75	3264.11	138-849C-9H-1,114-116	1.74669	0.727095	0.849499	5.593
90.77	3264.95	138-849C-9H-1,116-118	1.0635	0.0376614	1.2595	1.24059
90.79	3265.78	138-849C-9H-1,118-120	1.65496	0.535298	1.40521	5.11943
90.83	3267.44	138-849C-9H-1,122-124	1.36817	0.133433	1.12665	3.44981
90.87	3269.06	138-849C-9H-1,126-128	1.48075	0.466344	1.09295	4.14311
90.89	3269.86	138-849C-9H-1,128-130	1.33523	0.260187	1.11445	3.23553
90.91	3270.65	138-849C-9H-1,130-132	1.02695	0.0873663	1.1645	0.932652
90.93	3271.44	138-849C-9H-1,132-134	1.39114	0.0179413	0.863257	3.59502
90.95	3272.21	138-849C-9H-1,134-136	1.47858	0.271704	1.22936	4.12959
90.97	3272.97	138-849C-9H-1,136-138	1.53239	0.0346453	1.27036	4.44297
90.99	3273.73	138-849C-9H-1,138-140	1.19056	0.114932	1.22317	2.22875
91.01	3274.47	138-849C-9H-1,140-142	1.70252	0.0525238	1.15771	5.36622
91.03	3275.2	138-849C-9H-1,142-144	1.367	0.259152	1.28099	3.44069
91.05	3275.91	138-849C-9H-1,144-146	1.25814	0.0218819	0.99342	2.7126
91.11	3277.99	138-849C-9H-2,0-2	1.27802	0.127093	1.01276	2.84971
91.13	3278.65	138-849C-9H-2,2-4	1.27802	0.127093	1.01276	2.84957
91.15	3279.3	138-849C-9H-2,4-6	1.78845		1.37875	5.79713
91.17	3279.93	138-849C-9H-2,6-8	1.5898	0.500432	1.73853	4.7642
91.19	3280.55	138-849C-9H-2,8-10	1.73172		1.38074	5.51413
91.21	3281.15	138-849C-9H-2,10-12	1.41256	0.392769	1.29636	3.72707
91.23	3281.74	138-849C-9H-2,12-14	0.927426	0.0203987	1.26891	0.0362003
91.25	3282.31	138-849C-9H-2,14-16	1.1492	0.16506	1.0109	1.91684
91.27	3282.87	138-849C-9H-2,16-18	1.56064	0.082166	1.237	4.60124
91.29	3283.42	138-849C-9H-2,18-20	1.67173	0.322568	1.093	5.20429
91.31	3283.96	138-849C-9H-2,20-22	1.31381	0.0487725	1.05228	3.09077
91.33	3284.48	138-849C-9H-2,22-24	1.20517	0.200248	1.09898	2.33357
91.35	3285	138-849C-9H-2,24-26	1.23881	0.108604	1.08632	2.57498
91.37	3285.5	138-849C-9H-2,26-28	1.20469	0.240703	0.900186	2.32988
91.39	3286	138-849C-9H-2,28-30	1.12769	0.0508525	1.07821	1.75034
91.41	3286.49	138-849C-9H-2,30-32	1.48262	0.432742	1.40165	4.15062
91.43	3286.97	138-849C-9H-2,32-34	1.08992	0.0195514	1.15974	1.45136
91.45	3287.45	138-849C-9H-2,34-36	1.35681	0.197973	1.10056	3.37258
91.47	3287.91	138-849C-9H-2,36-38	1.082	0.0651913	1.06364	1.38714
91.49	3288.38	138-849C-9H-2,38-40	1.61353	0.856898	0.871061	4.89243
91.51	3288.84	138-849C-9H-2,40-42	1.10455	0.0325715	0.986252	1.56793
91.53	3289.29	138-849C-9H-2,42-44	1.1947	0.0836553	1.15254	2.25605
91.55	3289.75	138-849C-9H-2,44-46	1.19053	0.0727483	1.12925	2.22526
91.57	3290.2	138-849C-9H-2,46-48	1.33787		1.32235	3.2487
91.59	3290.65	138-849C-9H-2,48-50	1.15907	0.0894124	1.03447	1.99019
91.61	3291.1	138-849C-9H-2,50-52	1.11093	0.601925	1.10981	1.61793
91.63	3291.55	138-849C-9H-2,52-54	1.66814	0.184032	1.20622	5.18378
91.65	3292	138-849C-9H-2,54-56	1.14468	0.19334	1.05929	1.88028
91.67	3292.45	138-849C-9H-2,56-58	1.17563	0.219436	0.855775	2.11425
91.69	3292.9	138-849C-9H-2,58-60	1.17191	0.367028	1.02549	2.08635
91.71	3293.36	138-849C-9H-2,60-62	0.980207	0.0757035	0.796237	0.519351
91.73	3293.82	138-849C-9H-2,62-64	1.05111	0.312366	0.832007	1.13186
91.75	3294.28	138-849C-9H-2,64-66	0.89185	0.0344017	0.932156	-0.309478
91.77	3294.75	138-849C-9H-2,66-68	1.26477	0.244002	1.1348	2.7549
91.79	3295.23	138-849C-9H-2,68-70	0.908238	0.0549375	0.679202	-0.149951
91.81	3295.71	138-849C-9H-2,70-72	0.860459	0.166466	0.937274	-0.624091
91.83	3296.2	138-849C-9H-2,72-74	0.854971	0.0203634	0.702157	-0.680316
91.85	3296.7	138-849C-9H-2,74-76	1.20686	0.374541	0.822699	2.34332
91.87	3297.21	138-849C-9H-2,76-78	0.996835	0.0650229	0.806182	0.666129
91.89	3297.72	138-849C-9H-2,78-80	1.02508	0.231367	1.14919	0.911143
91.91	3298.25	138-849C-9H-2,80-82	1.2066	0.0845192	0.59019	2.34113
91.93	3298.79	138-849C-9H-2,82-84	1.0394	0.305868	0.870385	1.03259
91.95	3299.34	138-849C-9H-2,84-86	0.914447	0.0236113	0.879871	-0.0910285
91.97	3299.9	138-849C-9H-2,86-88	0.867874	0.10353	1.03447	-0.549673
91.99	3300.48	138-849C-9H-2,88-90	0.930361	0.0138988	0.863411	0.0600838
92.01	3301.07	138-849C-9H-2,90-92	0.970168	0.27811	0.692144	0.427472
92.03	3301.67	138-849C-9H-2,92-94	1.67383	0.087244	0.801034	5.21156
92.05	3302.29	138-849C-9H-2,94-96	1.47252	0.882359	0.801269	4.08741
92.07	3302.93	138-849C-9H-2,96-98	1.00262	0.0378222	0.639556	0.715741
92.09	3303.58	138-849C-9H-2,98-100	1.3721	0.126982	0.841105	3.46754
92.11	3304.25	138-849C-9H-2,100-102	1.19229	0.041292	0.879815	2.23529
92.13	3304.94	138-849C-9H-2,102-104	1.36674	0.206506	0.783294	3.43293
92.15	3305.65	138-849C-9H-2,104-106	1.53443	0.0639077	0.740163	4.44797
92.17	3306.37	138-849C-9H-2,106-106	1.06282	0.0984505	0.746193	1.22651
92.19	3307.12	138-849C-9H-2,108-110	1.49156	0.104995	0.525136	4.19915
92.21	3307.89	138-849C-9H-2,110-112	1.51471	1.18231	0.865667	4.33404
92.23	3308.68	138-849C-9H-2,112-114	1.21674	0.0470763	0.633805	2.41242
92.25	3309.5	138-849C-9H-2,114-116	1.28916	0.372627	1.06855	2.91944
92.27	3310.33	138-849C-9H-2,116-118	1.84488	0.274644	1.13385	6.0633
92.29	3311.18	138-849C-9H-2,118-120	1.57631	0.27063	0.953034	4.68309
92.31	3312.04	138-849C-9H-2,120-122	1.12739	0.0336098	0.763118	1.74269
92.33	3312.93	138-849C-9H-2,122-124	1.35551	0.496061	1.15186	3.35897
92.35	3313.83	138-849C-9H-2,124-126	1.39224	0.334904	0.92612	3.59326
92.37	3314.75	138-849C-9H-2,126-128	1.06094	0.22272	0.936677	1.20927
92.39	3315.68	138-849C-9H-2,128-130	1.8824	0.396485	1.22789	6.23882
92.41	3316.63	138-849C-9H-2,130-132	1.28571	0.208312	1.26074	2.89445
92.43	3317.59	138-849C-9H-2,132-134	1.90486	0.118569	1.35481	6.34247
92.45	3318.56	138-849C-9H-2,134-136	1.42721	0.636101	1.41343	3.80991
92.47	3319.54	138-849C-9H-2,136-138	1.12699	0.0369078	1.14059	1.73806
92.49	3320.54	138-849C-9H-2,138-140	1.53737	1.11465	1.21844	4.46174
92.51	3321.54	138-849C-9H-2,140-142	1.82149	0.940535	1.10873	5.94907
92.53	3322.56	138-849C-9H-2,142-144	1.14774	0.292919	1.51858	1.89746
92.57	3324.61	138-849C-9H-2,146-148	1.63702	1.20082	1.25679	5.01183
92.61	3326.69	138-849C-9H-3,0-2	1.59649	0.204164	1.7022	4.79148
92.63	3327.74	138-849C-9H-3,2-4	1.50892	0.318431	1.18382	4.29641
92.65	3328.79	138-849C-9H-3,4-6	1.22185	0.217004	1.08385	2.44505
92.69	3330.91	138-849C-9H-3,8-10	1.54571		1.41727	4.50707
92.71	3331.97	138-849C-9H-3,10-12	1.57575	0.497943	1.16059	4.6757
92.73	3333.03	138-849C-9H-3,12-14	1.25469	0.23355	1.07335	2.67683
92.75	3334.1	138-849C-9H-3,14-16	1.59299	0.630903	1.04483	4.77069
