# Supplementary material for: Limited exchange between the deep Pacific and Atlantic oceans during the warm mid-Pliocene and Marine Isotope Stage M2 “glaciation”
Source: Copernicus journal article supplement (doi:10.5194/cp-19-2109-2023), 2023-11-01
Supplement: Supplementary file 1 [file cp-19-2109-2023-supplement.zip]

Archive with 3 entries (3 files):
- cp-19-2109-2023-supplement-title-page.pdf
- Braaten et al. Supplement_Tables.xlsx
- Braaten et al. Supplementary information.docx
