# Supplementary material for: Limited exchange between the deep Pacific and Atlantic oceans during the warm mid-Pliocene and Marine Isotope Stage M2 “glaciation”
Source: Copernicus journal article supplement (doi:10.5194/cp-19-2109-2023), 2023-11-01
Supplement: Supplementary file 1 [file cp-19-2109-2023-supplement.zip › cp-19-2109-2023-supplement-title-page.pdf]

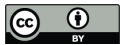

## *Supplement of*

# **Limited exchange between the deep Pacific and Atlantic oceans during the warm mid-Pliocene and Marine Isotope Stage M2 “glaciation”**

**Anna Hauge Braaten et al.**

*Correspondence to:* Anna Hauge Braaten ([anna.braaten@uib.no](mailto:anna.braaten@uib.no))

- [cp-19-2109-2023-supplement-title-page.pdf](#)
- [Braaten et al. Supplement\\_Tables.xlsx](#)
- [Braaten et al. Supplementary information.docx](#)

The copyright of individual parts of the supplement might differ from the article licence.
